# Supplementary material
Source: PubMed Central journal article supplement (PMC4720503)
Supplement: NIHMS750510-supplement-01.pdf [file NIHMS750510-supplement-01.pdf]

# **Functional characterization of the antibiotic resistance reservoir in the human microflora**

## **Supporting Online Materials**

Morten O.A. Sommer<sup>\*</sup>, Gautam Dantas<sup>\*</sup> & George M. Church<sup>^</sup>

Department of Genetics, Harvard Medical School, Boston, MA-02115, USA.

<sup>\*</sup> These authors contributed equally to this work

<sup>^</sup>Correspondence and requests for materials should be addressed to G.M.C.  
(<http://arep.med.harvard.edu/gmc/email.html>).

### **Materials and Methods**

#### **Isolation of metagenomic DNA from human microbiome samples.**

Saliva and fecal samples were obtained from two healthy unrelated volunteers according to protocols approved by the Harvard Medical School Institutional Review Board (Study # M15656-101).

DNA from gut microbiomes was extracted directly from fecal samples using the PowerMax Soil DNA Isolation Kit (Mobio Laboratories Inc.) according to their suggested protocol

(<http://www.mobio.com/files/protocol/12988.pdf>), using 5 g of fecal sample instead of the soil sample referred to in the protocol.

DNA from oral microbiomes was extracted directly from saliva samples using the MasterPure DNA Purification kit from Epicentre according to the following protocol:

1. Dilute 1  $\mu$ l of 50 mg/ml Proteinase K into 150  $\mu$ l of 2X T and C Lysis Solution.
2. Pellet 1000  $\mu$ L of saliva sample
3. Remove supernatant and add 150  $\mu$ l of 2X T and C Lysis buffer with Proteinase K and mix thoroughly.
4. Incubate at 65 °C for 15 minutes; vortex mix every 5 minutes.
5. Cool the samples to 37 °C and add 1  $\mu$ l of 5 mg/ml RNase A to the sample; mix thoroughly.
6. Incubate at 37 °C for 30 minutes.
7. Place the samples on ice for 3-5 minutes
8. Add 250  $\mu$ l of MPC Protein Precipitation Reagent to cold lysed sample and vortex mix vigorously for 10 seconds.
9. Pellet the debris by centrifugation for 10 minutes at 10,000 x g in a microcentrifuge.
10. Transfer the supernatant to a clean microcentrifuge tube and discard the pellet.
11. Add 750  $\mu$ l of isopropanol to the recovered supernatant. Invert the tube several (30-40) times.
12. Pellet the DNA by centrifugation at 4 °C for 10 minutes in a microcentrifuge.
13. Carefully pour off the isopropanol without dislodging the DNA pellet.

14. Rinse twice with 75% ethanol
15. Remove all of the residual ethanol with a pipette.
16. Resuspend the DNA in 20  $\mu$ l of 10 mM Tris pH 8

### **Clonal isolation of microbiome isolates and growth profiling in the presence of antibiotics.**

572 microbiome isolates capable of growing on Luria broth (LB) agar under aerobic conditions were isolated from fecal samples collected from two unrelated healthy volunteers at three different sampling times (day 1, 140 and 141). Dilutions of fecal samples were plated out on LB agar within 3 hours of sample collection, and incubated for 24 hrs at 37 °C. To profile the ability of these isolates to grow in the presence of antibiotics, individual colonies were picked and inoculated into LB liquid medium for 24 hrs at 37 °C. 5  $\mu$ L of these cultures were inoculated into 200  $\mu$ L LB medium containing one of 13 antibiotics at concentrations determined to prevent the growth of wild type *E. coli* (Table S1). Cultures were incubated for 24 hrs at 37 °C and growth was assayed by absorption at 600 nm using a Versamax plate reader from Molecular Devices. For each isolate, absorbance values corresponding to growth in each of the 13 antibiotics was background subtracted (absorbance of un-inoculated LB media) and normalized to corresponding growth in the absence of antibiotic. We expected some temporal variation in the fecal microbiome samples resulting from variables that were not assayed in the study (e.g. diet). In an attempt to achieve a consensus view of the antibiotic resistance profiles of the healthy individuals sampled, we averaged profiles over three sampling days (Day 1, Day 140,

Day 141) (Figure 2). The ability of the isolates to grow in the presence of antibiotics is shown for each sampling time in Figure S2 and S3.

### **Phylogenetic profiling.**

The 16S ribosomal DNA (rDNA) of cultured isolates was amplified using universal bacterial 16S primers:

>Bact\_63f\_62C

5' – CAG GCC TAA CAC ATG CAA GTC – 3'

>Bact\_1389r\_63C

5' – ACG GGC GGT GTG TAC AAG – 3'

16S rDNA amplicons were sequenced for phylogenetic profiling. Phylogeny was determined using SeqMatch from the Ribosomal Database Project II server(1) and is displayed in Figure S1.

### **Isolation of genomic DNA from human microbiome isolates.**

Microbiome isolates from gut microbiome samples were grown up in 200 µL LB and incubated for 24 hrs at 37 °C. All saturated cultures derived from a particular fecal sample were pooled and cells were harvested by centrifugation. DNA was extracted using the PowerMax Soil DNA Isolation Kit (Mobio Laboratories Inc.) according to their suggested protocol (<http://www.mobio.com/files/protocol/12988.pdf>) using the pelleted cells from the combined

microbiome isolates of each microbiome sample instead of the soil sample referred to in the protocol.

### **Library construction**

All DNA used for functional selections was sheared using a custom made semi automated DNA shearer to a size range of 500 – 3500 base pairs. Sheared DNA was end-repaired using the End-It end repair kit (Epicentre) with the following protocol:

1. Combine:
  - a. 276  $\mu\text{L}$  of sheared DNA (30 ng/ $\mu\text{L}$ )
  - b. 40  $\mu\text{L}$  10 X End Repair Buffer
  - c. 40  $\mu\text{L}$  2.5 mM dNTP mix
  - d. 40  $\mu\text{L}$  10 mM ATP
  - e. 4  $\mu\text{L}$  of End-It enzyme mix
2. Incubate at room temp for 45 minutes
3. Heat inactivate at 70 °C for 20 minutes

End-Repaired DNA was size selected by electrophoresis through a 1 % low melting point agarose gel in 0.5X TBE buffer. A gel slice corresponding to 1000-3000 base pairs was excised from the gel and DNA was extracted using a QIAquick Gel Extraction Kit (Qiagen).

DNA was ligated into pZE21 MCS 1 vector (2) at the HincII site using the Fast Link ligation kit (Epicentre) with the following ligation protocol:

1. Combine:
  - a. 0.5  $\mu$ L 10X Ligation buffer
  - b. 0.25  $\mu$ L 10 mM ATP
  - c. 0.25  $\mu$ L dH<sub>2</sub>O
  - d. 0.50  $\mu$ L HincII cut pZE21 MCS 1 vector (300 ng/ $\mu$ L)
  - e. 2.50  $\mu$ L Sheared, End-repaired, Gel purified DNA insert (300 ng/ $\mu$ L)
  - f. 1.0  $\mu$ L Fast-Link ligase (2 units/ $\mu$ L)
2. Incubate at room temperature for 16 hrs
3. Heat inactivate at 70 °C for 20 minutes

4  $\mu$ L of the fresh ligation mixture was used for transformation by electroporation into 50  $\mu$ L of electrocompetent *E. coli* TOP10 cells (Invitrogen). After transformation using standard protocols for a 1 mm electroporation cuvette, cells were recovered in 1 mL SOC medium for 1 hr at 37 °C. Libraries were titered by plating out 1  $\mu$ L and 0.01  $\mu$ L of recovered cells onto LB agar plates containing 50  $\mu$ g/mL kanamycin. For each library, insert size distribution was estimated by gel electrophoresis of PCR products obtained by amplifying the insert using primers flanking the HincII site of the multiple cloning site of the pZE21 MCS1 vector (which contains a selectable marker for kanamycin resistance). The average insert size for all libraries was found to be 1.8 kilo base pairs. The total size of each of the genomic and metagenomic libraries as determined by multiplying average PCR based insert size with the number of colony forming units (cfu) in a

given library varied between  $0.3 - 5 \times 10^9$  base pairs. The rest of the recovered cells were inoculated into 10 mLs of LB containing 50  $\mu\text{g}/\text{mL}$  kanamycin and grown overnight. The overnight culture was frozen down with 15 % glycerol and kept at  $-80\text{ }^\circ\text{C}$  for subsequent screening.

### **Functional selections of antibiotic resistant clones from metagenomic and genomic libraries derived from human microbiomes**

For each metagenomic and genomic library tested, 100  $\mu\text{L}$  of library freezer stock corresponding to  $0.5-1 \times 10^8$  cfu were plated out on LB agar plates containing binary combinations of kanamycin (50  $\mu\text{g}/\text{mL}$ ) and one of 13 different antibiotics (Table S1) and incubated at  $37\text{ }^\circ\text{C}$  for 16 hrs.

To enable functional selections for resistance to multiple compounds, the transformed cells were allowed to grow up overnight before freezing stocks, allowing each clone harboring a unique DNA insert to grow, resulting in an amplification of the particular clone in the library. Based on the original library titers as well as titers of the freezer stocks, the average amplification of a given library can be estimated. On average each unique clone in the libraries screened was plated out in 10-100 copies depending on library size, corresponding to a 10-100 fold amplification. To minimize the redundancy of clones in subsequent analysis, on average the number of colonies picked for sequencing corresponded to approximately the number of resistant clones on an agar plate divided by the estimated average library amplification.

Each of the clones picked was inoculated into liquid LB medium containing kanamycin (50 µg/mL) and the relevant antibiotic to which resistance had been selected (Table S1) and grown overnight to verify resistance phenotype.

### **Sequencing and analysis of metagenomic and genomic inserts from the human microbiome**

Selected metagenomic and genomic inserts harbored by clones identified in the functional selections were sequenced using Sanger sequencing. A total of 634 clones (Table S5) were sequenced bi directionally using the following primers:

>pZE21\_81\_104\_57C

5' – GAA TTC ATT AAA GAG GAG AAA GGT - 3'

>pZE21\_151\_174rc\_58C

5' – TTT CGT TTT ATT TGA TGC CTC TAG – 3'

For each read, sequence corresponding to the cloning vector was removed using DNASTar Laser Gene v. 8.0 – SeqMaster. Assembly of each pair of reads from each clone was attempted using SeqMaster. The remaining reads that were not fully assembled were compared to each other using BLAST and were considered to be derived from two colonies containing the same insert if they were more than 99% identical at the nucleotide level over a stretch longer than 400 base pairs. Only one clone from each set of clones, containing inserts defined to be identical based on these criteria, was selected for subsequent sequencing. For each unique clone, primers were



designed for each read to close the insert sequence. This process was repeated once more to close inserts that were particularly large. Finally, 210 unique full length inserts were assembled.

Open reading frames were identified and annotated using ORFfinder (<http://www.ncbi.nlm.nih.gov/projects/gorf/>). Annotated resistance genes were compared to the GenBank non redundant nucleotide database using tblastx, which computes local sequence alignment between the nucleotide query translated in all 6 frames and the non redundant nucleotide database translated in all 6 frames. For each query, the genbank ID and the alignment coordinates for the top scoring tblastx hit as well as the top scoring tblastx hit derived from a clinical pathogenic isolate was obtained. A hit was considered to be harbored by a clinical pathogenic isolate if the genbank publication reference specifically denoted a pathogenic clinical isolate as the origin of the sequence. For each of these top scoring hits, any annotated feature which overlapped the alignment coordinates in the specific genbank file was obtained from GenBank. Global sequence alignments and corresponding percentage identities between the query and the obtained sequences were computed using clustalW (3) at the nucleotide level as well as the amino acid level in the annotated frame. When multiple annotated features were obtained for a query sequence, only the sequence most similar to the query at the nucleotide level was retained (Tables S3 and S4).

Additionally, the sequence identity between resistance genes isolated from individuals 1 and 2 were computed. For each resistance gene isolated from individual 1, the global sequence identity to the most similar gene (as determined by BLAST) from individual 2 was computed using clustalW. Genes were categorized as either unique to an individual or shared between the

two, based on a greater than 90 % global nucleotide sequence identity threshold for similarity (Table S7). Interestingly, more than 65 % of the genes derived from cultured aerobic gut isolates are shared between the two individuals, whereas less than 10 % of the metagenomically derived genes are shared between the two individuals. All of the genes (metagenomic and cultured gut aerobes) shared between individuals have close homologs in GenBank. While 84 % of the genes unique to an individual from cultured aerobic isolates also have close homologs in GenBank, only 11 % of the metagenomically derived genes unique to an individual have close homologs in GenBank. These data argue that application of functional metagenomic selections to the microbiomes of additional individuals would discover a significant number of novel antibiotic resistance genes.

#### **Library sequence coverage and estimation of total number of resistance conferring inserts**

Of the 210 inserts, 95 were derived from metagenomic libraries of a total size of 9.3 Gb and 115 were derived from libraries made from cultured aerobes with a total size of 7.5 Gb (Table S5). For the metagenomically derived inserts 58% of these were only sequenced once; for the libraries derived from cultured aerobes this number was 67% (Figure S4 C and D). The fact that more than half of the inserts identified have only been sequenced once suggests that many more resistance genes can be identified in these libraries if more clones are sequenced. In an attempt to estimate the total number of unique resistance conferring inserts in our libraries, we performed a least square fit of a Poisson distribution to our sequence coverage distributions (Figure S4). While the criteria for Poisson statistics (mean equals variance) are poorly satisfied

for our data set, we obtained least square fits to our sequence coverage distributions for our metagenomic and cultured gut aerobe libraries with the mean equal to 0.62 and 0.175, respectively (Figure S4 A and B). Based on these mean values and Poisson statistics we would expect to find another 440 resistance conferring inserts by exhaustively sequencing our libraries derived from cultured aerobes and another 89 resistance conferring inserts from our metagenomic libraries.

### **Naming of novel beta-lactamase genes**

For genes that had significant homology (>85%) at the amino acid level to previously known beta-lactamase proteins, names were assigned according to the standard beta-lactamase conventions (4) with the family name (*CblA*, *CfxA* and *TEM*) followed by a sequentially increasing number (Table 1 and Figure 4). Numbers were chosen to increment from the latest named enzyme deposited to Genbank from each family (4). Due to the specific nomenclature in the literature for the *AmpC* family of enzymes (5, 6), novel genes were named with the family followed by the two letter code HG (**H**uman **G**ut) denoting origin of enzyme followed by a number (Table 1 and Figure 4).

Beta-lactamase genes that encoded proteins less than 65 % identical to known gene products in GenBank were considered to be novel beta-lactamase enzyme families. Each family was named according to the guidelines outlined in (5, 7), with a two letter code corresponding to the source (HG – Human Gut and HO – Human Oral) followed by a third unique letter distinguishing each family (Table 1 and Figure 4).

**Phylogenetic analysis of antibiotic resistance genes**

We performed phylogenetic analyses for all genes in our study, categorized by the specific antibiotic class to which they confer resistance. The amino acid sequences for unique resistance genes derived from functional selections of genomic and metagenomic libraries from gut and oral microbiomes from healthy humans were aligned in ClustalX (8) using the GONNET protein weight matrix. Unrooted phylogenetic trees were generated from ClustalX alignments, using the neighbor-joining algorithm of Saitou and Nei (9) based on the principle of minimum-evolution, along with bootstrap analysis (1000 replicates) in ClustalX. For the beta-lactamase resistance genes shown in Figure 4, the tree was plotted using DRAWTREE in the PHYLIP package, and except for the nodes indicated all bootstrap values = 1000. For the remaining resistance gene classes (Figures S5, S6 and S7), trees were plotted using NJtree and all bootstrap values are displayed. Tree branch lengths are proportional to relative sequence identity, and the scale bar is in fixed amino acid substitutions per sequence position.

**Limitations of PCR and metagenomic functional selections in sampling resistance reservoirs**

Antibiotic resistance genes in microbial environments can be interrogated using PCR based approaches (10-12). However, the success of these methods is limited to detection of sequences similar to known genes and requires separate functional confirmation of amplified genes. In comparison, as we have shown, metagenomic functional selections directly associate the selected resistance phenotype with the identified full length gene transferred to the

selection host, and are thus ideally suited for interrogation of the microbiomic resistance reservoir that is accessible to lateral gene transfer. However, metagenomic functional selections for characterization of resistance reservoirs have certain limitations as well. These primarily involve the requirement for (1) host susceptibility to the antibiotics assayed, (2) appropriate translation and functional compatibility of heterologous gene products in the host, and (3) the resistance gene to encode a dominant phenotype that overcomes the host mechanism of susceptibility. Methods to overcome these limitations include (1) use of multiple host strains which span the spectrum of antibiotic susceptibility mechanisms assayed, (2) engineering of new host strains with an expanded repertoire of translational machinery including rare codon transfer RNAs, and (3) the use of conditional host strain mutants which suppress specific dominant antibiotic susceptibility loci allowing complementation by a transferred resistance gene that is otherwise recessive. Despite current limitations, metagenomic functional selections are useful for the identification of numerous known as well as novel resistance genes, since their success is independent of prior knowledge of the sequence of previously identified genes (13).

## Supporting Figures

Figure S1: Phylogenetic distribution of gut microbiome day 1 isolates. The 16S ribosomal DNA (rDNA) of cultured isolates was amplified using universal bacterial 16S primers, and sequenced for phylogenetic profiling. Phylogeny was determined using SeqMatch from the Ribosomal Database Project II server(1)

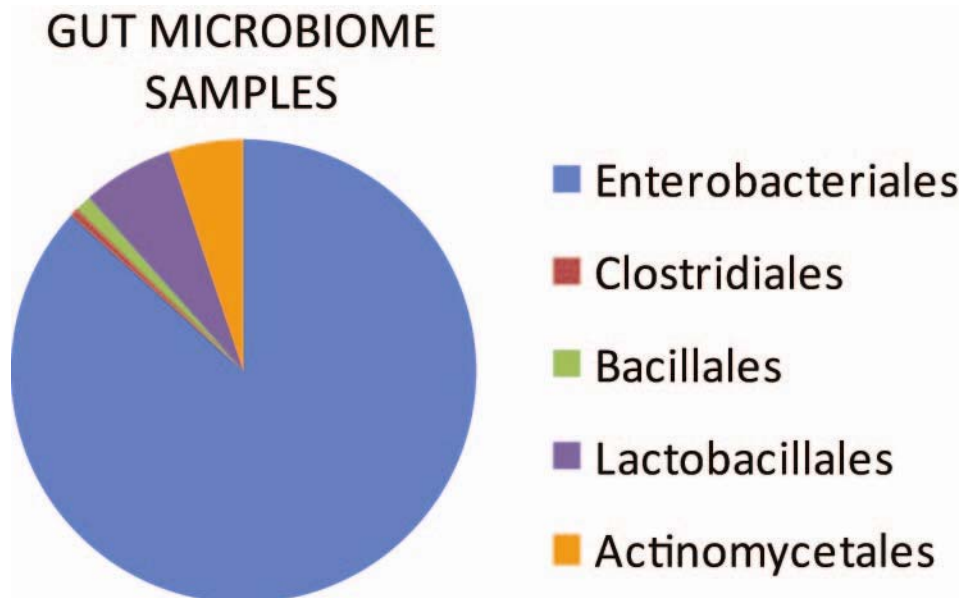

Figure S2: Heat maps of antibiotic resistance of bacterial isolates from gut microbiome 1 at day 1, 140 and 141. Growth measurements of microbiome isolates after 24 hrs at 37 °C in rich media containing antibiotics at concentrations preventing growth of wild type *E.coli* (Table S1) are displayed as linear color-scaled squares, where white denotes no growth, and color intensity is proportional to growth in the presence of antibiotic, scaled to growth in the absence of antibiotic per individual isolate.

# HUMAN GUT MICROBIOME 1 ISOLATES

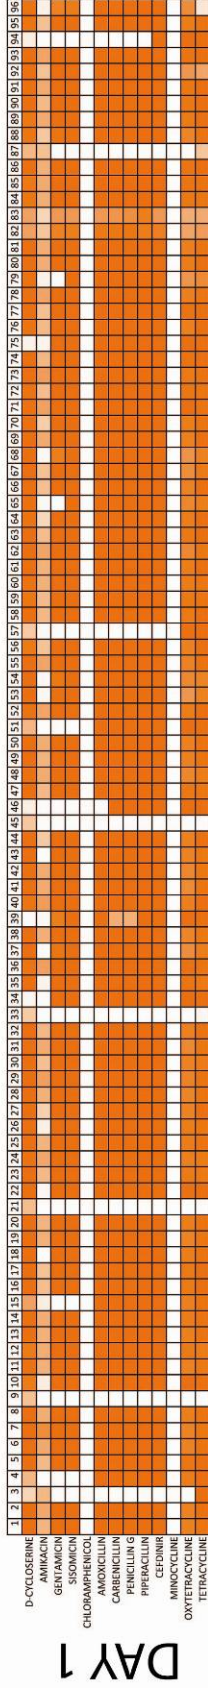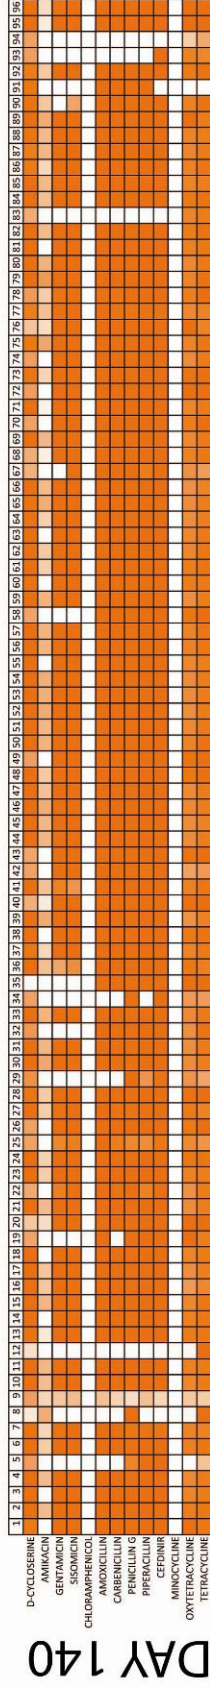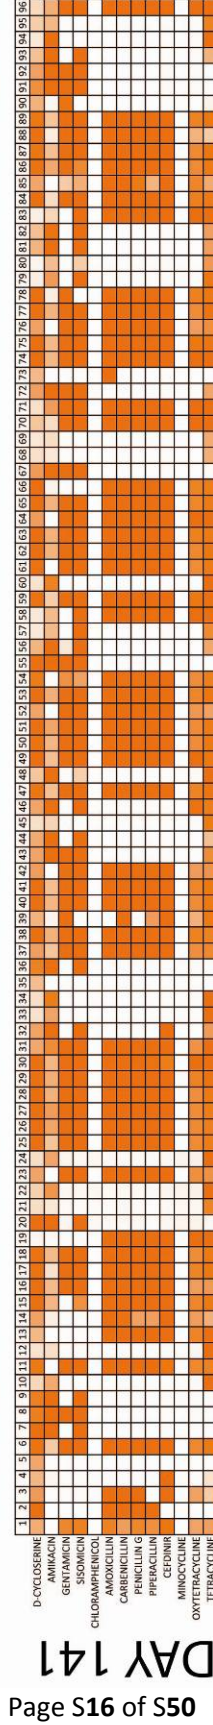



Figure S3: Heat maps of antibiotic resistance of bacterial isolates from gut microbiome 2 at day 1, 140 and 141. Growth measurements of microbiome isolates after 24 hrs at 37 °C in rich media containing antibiotics at concentrations preventing growth of wild type *E.coli* (Table S1) are displayed as linear color-scaled squares, where white denotes no growth, and color intensity is proportional to growth in the presence of antibiotic, scaled to growth in the absence of antibiotic per individual isolate.

HUMAN GUT MICROBIOME 2 ISOLATES

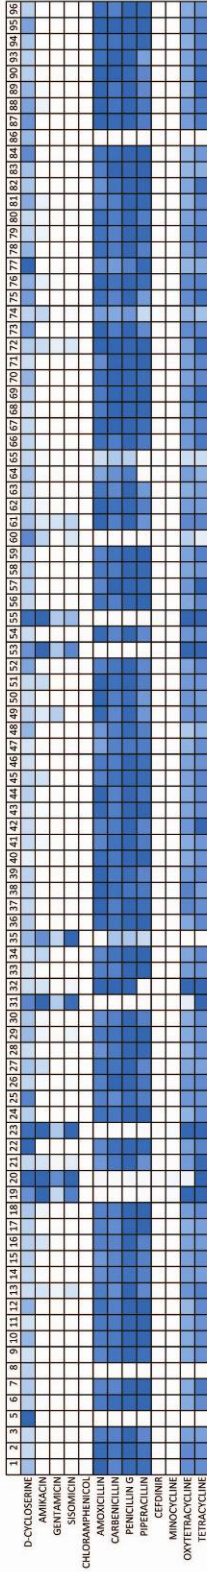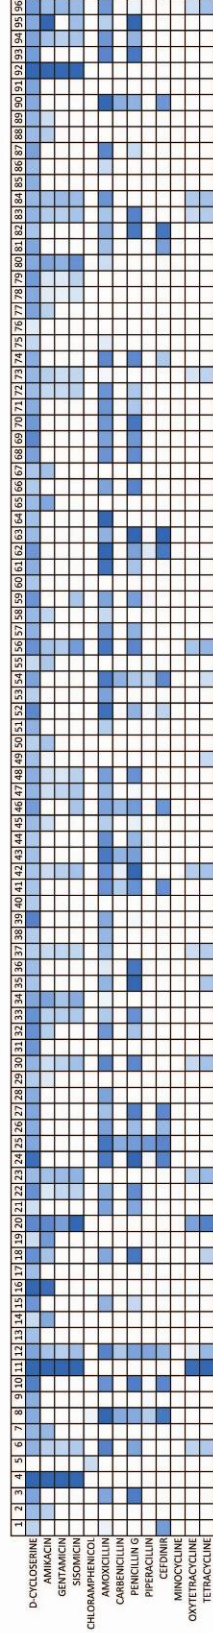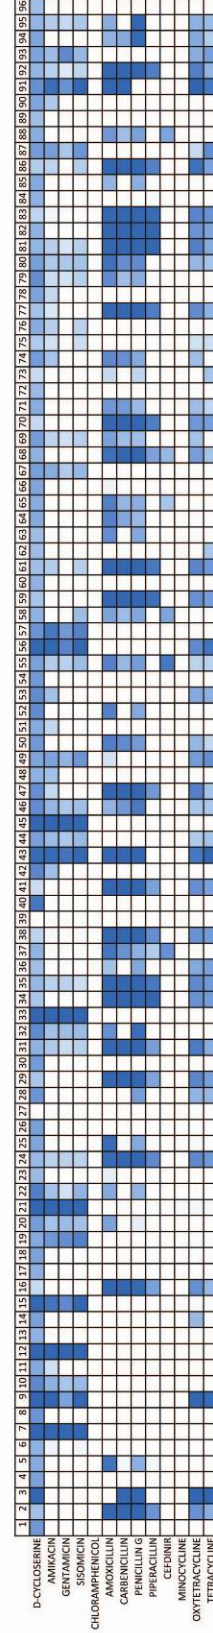

Figure S4: Sequencing sampling depth of resistance conferring inserts. For each sampling depth, the number of unique resistance conferring inserts is displayed for (A) metagenomic libraries and (B) the libraries derived from cultured aerobic gut isolates. The dotted line shows the best fit of a Poisson distribution to our sampling data, where the mean of the best Poisson fit for the metagenomic libraries is 0.62 and for the libraries derived from the cultured aerobic isolates is 0.17. The number of times that a particular insert has been sequenced is displayed for (C) the metagenomic libraries and (D) the libraries derived from the cultured aerobic isolates.

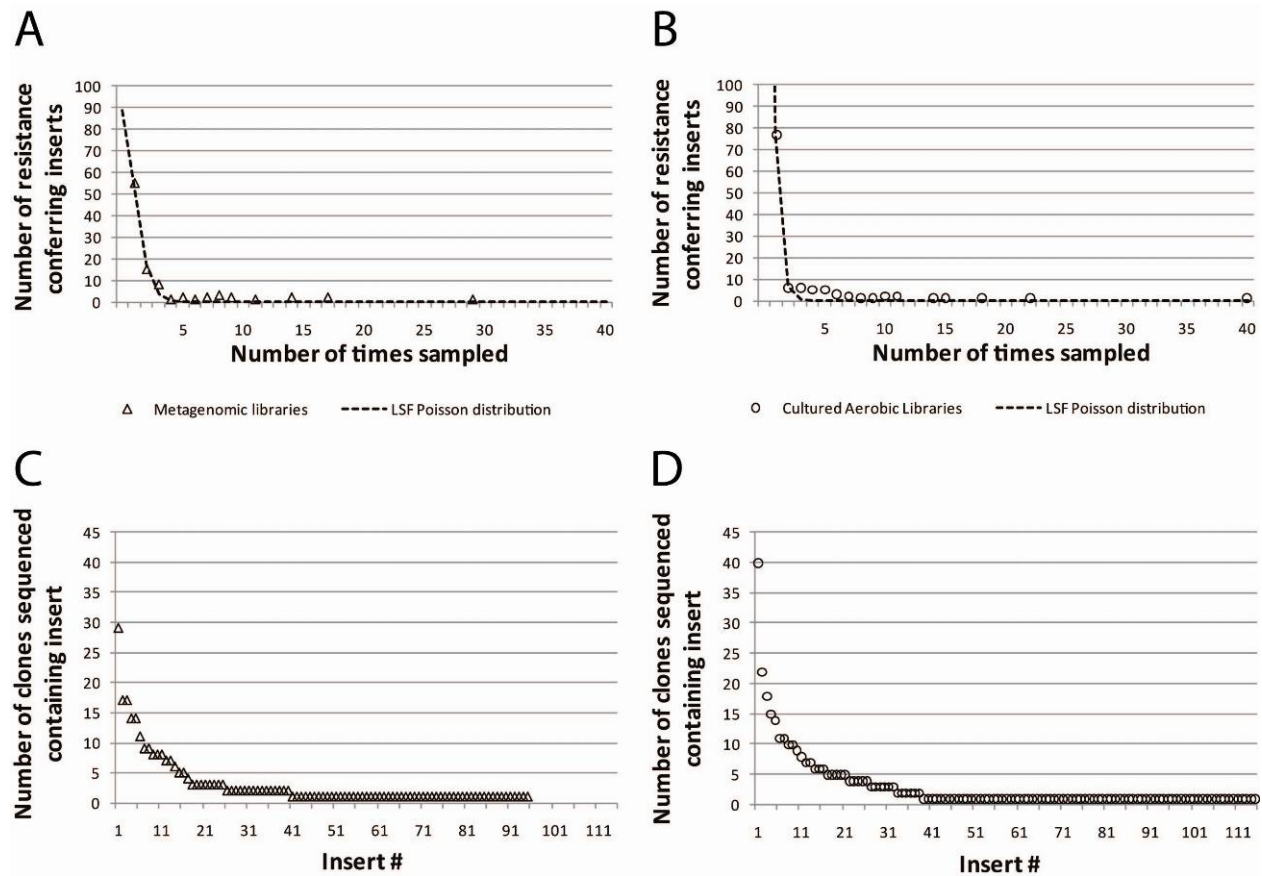

Figure S5: Phylogenetic distribution of full-length gene products encoding aminoglycoside resistance from human microbiomes. The amino acid sequences for all aminoglycoside resistance genes encoded within unique inserts derived from functional selections of genomic (blue labels) and metagenomic (red labels) libraries from gut and oral microbiomes from two healthy humans were aligned in ClustalX (8) along with the most closely related genes in GenBank (black labels) (Tables S3 and S4) using the GONNET protein weight matrix. Unrooted phylogenetic trees were generated from ClustalX alignments, using the neighbor-joining algorithm of Saitou and Nei (9) based on the principle of minimum-evolution, along with bootstrap analysis (1000 replicates) in ClustalX, and plotted using NJtree. Bootstrap values are indicated on corresponding branches. Tree branch lengths are proportional to relative sequence identity, and the scale bar is in fixed amino acid substitutions per sequence position.

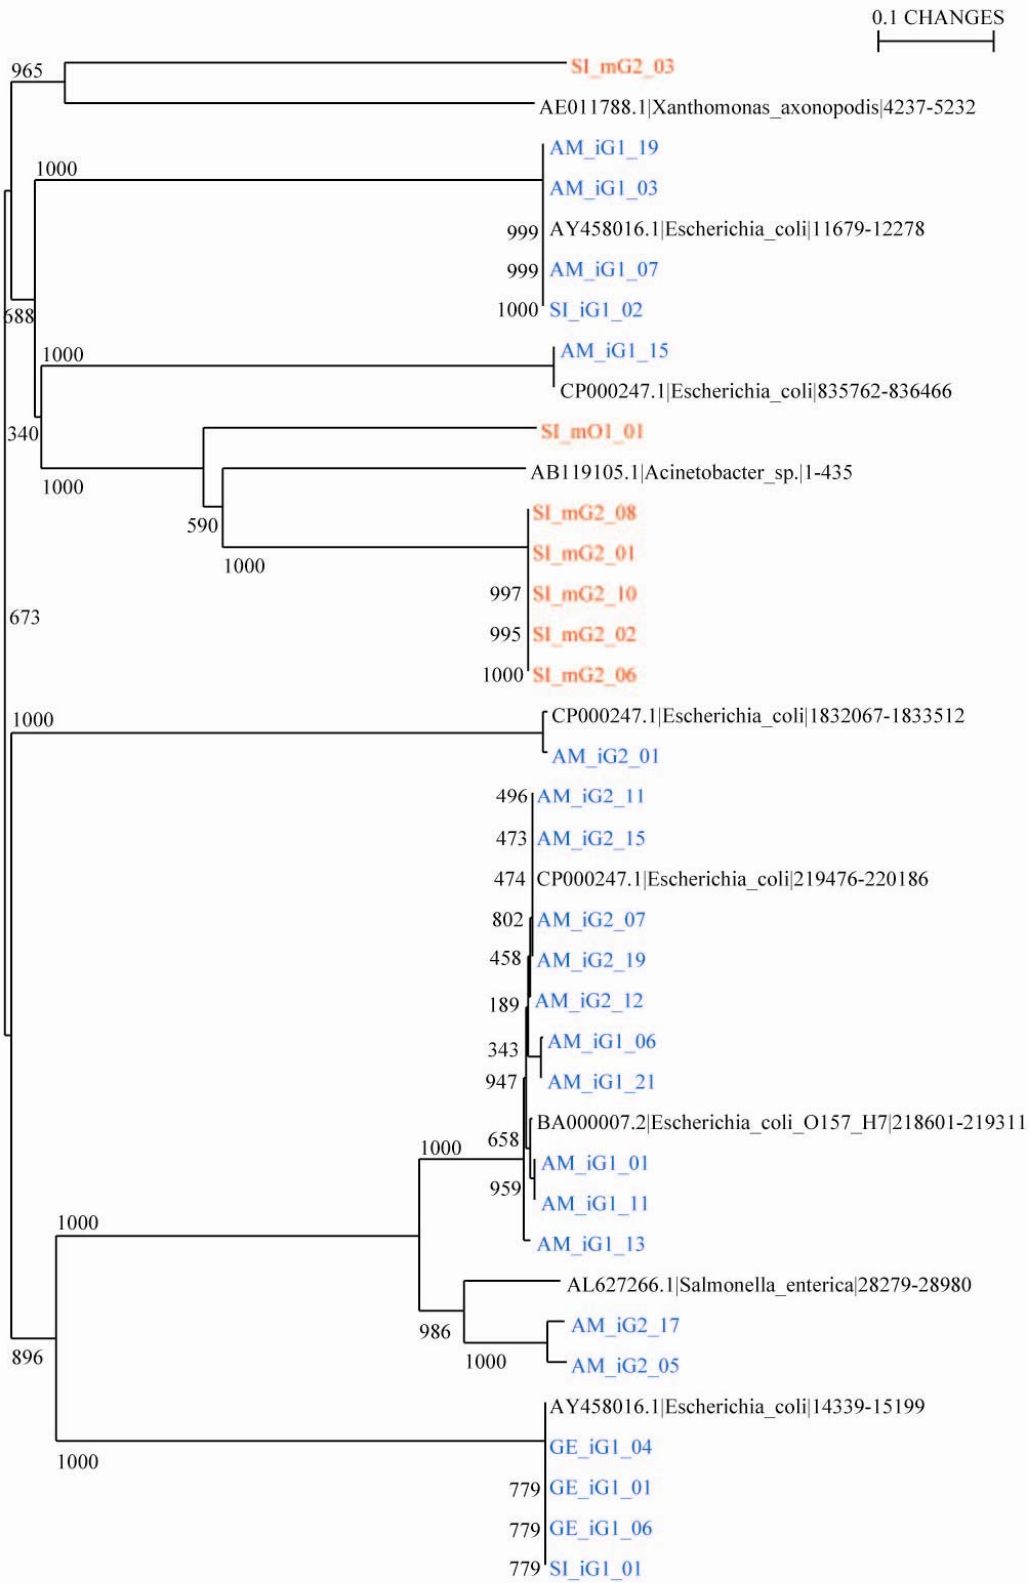

Figure S6: Phylogenetic distribution of full-length gene products encoding D-cycloserine resistance from human microbiomes. The amino acid sequences for all D-cycloserine resistance genes encoded within unique inserts derived from functional selections of genomic (blue labels) and metagenomic (red labels) libraries from gut and oral microbiomes from two healthy humans were aligned in ClustalX (8) along with the most closely related genes in GenBank (black labels) (Tables S3 and S4) using the GONNET protein weight matrix. Unrooted phylogenetic trees were generated from ClustalX alignments, using the neighbor-joining algorithm of Saitou and Nei (9) based on the principle of minimum-evolution, along with bootstrap analysis (1000 replicates) in ClustalX, and plotted using NJtree. Bootstrap values are indicated on corresponding branches. Tree branch lengths are proportional to relative sequence identity, and the scale bar is in fixed amino acid substitutions per sequence position.

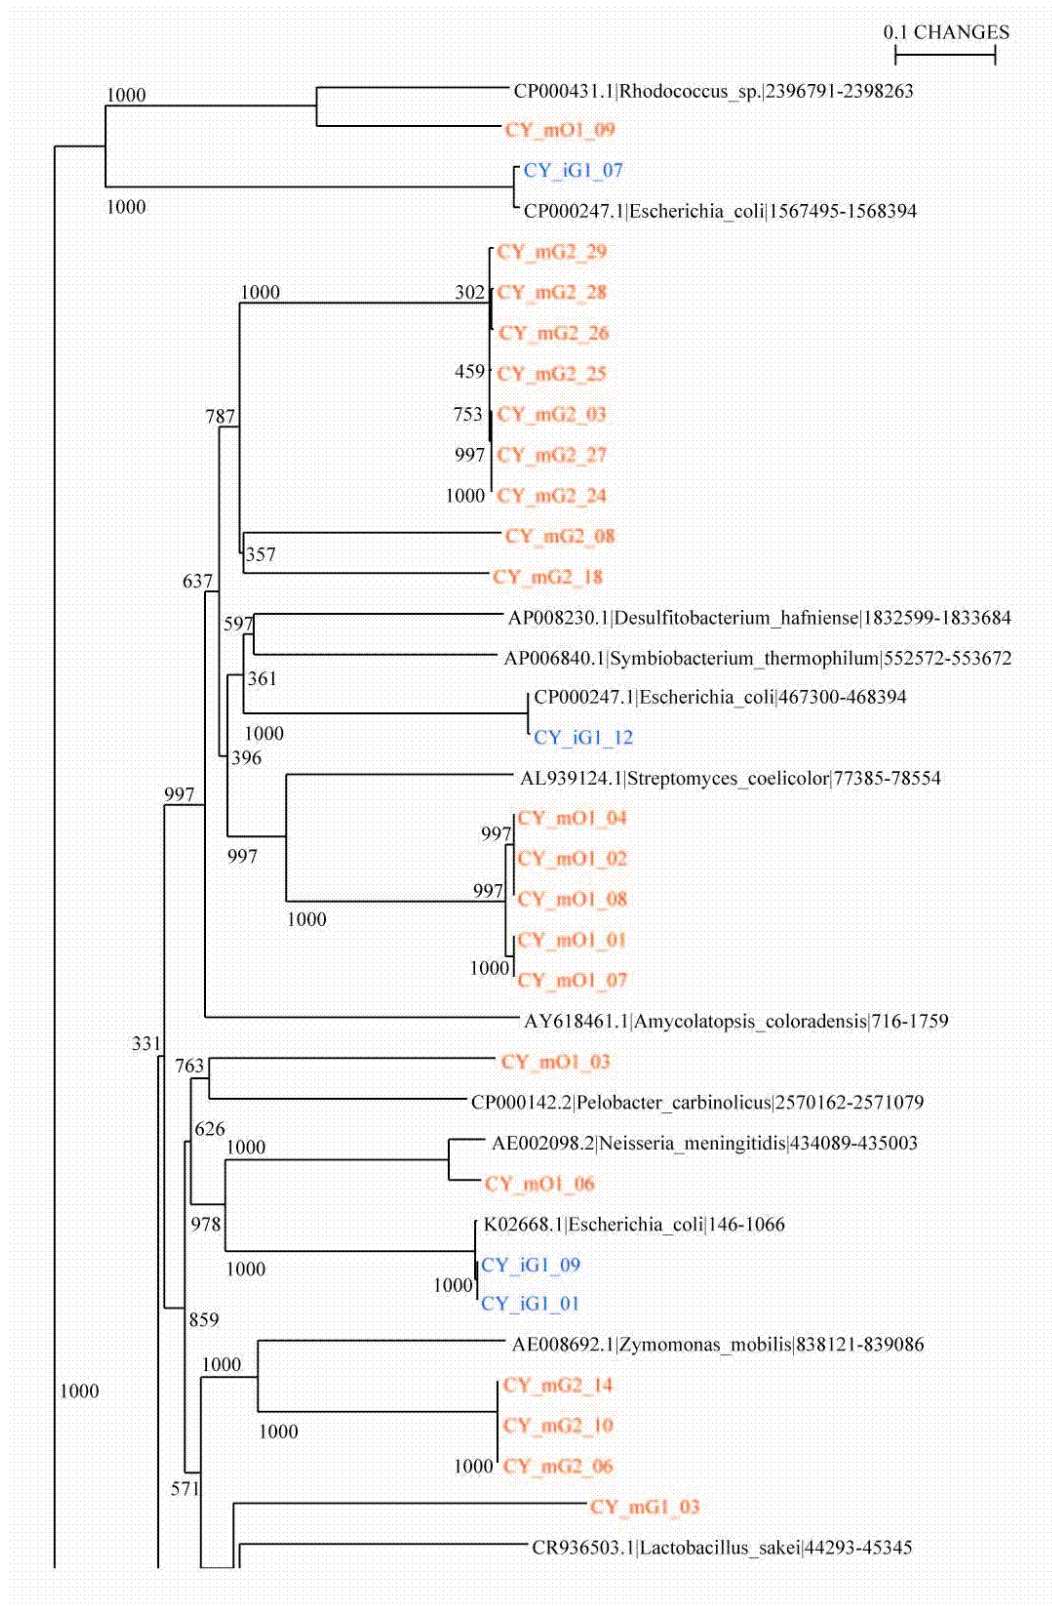





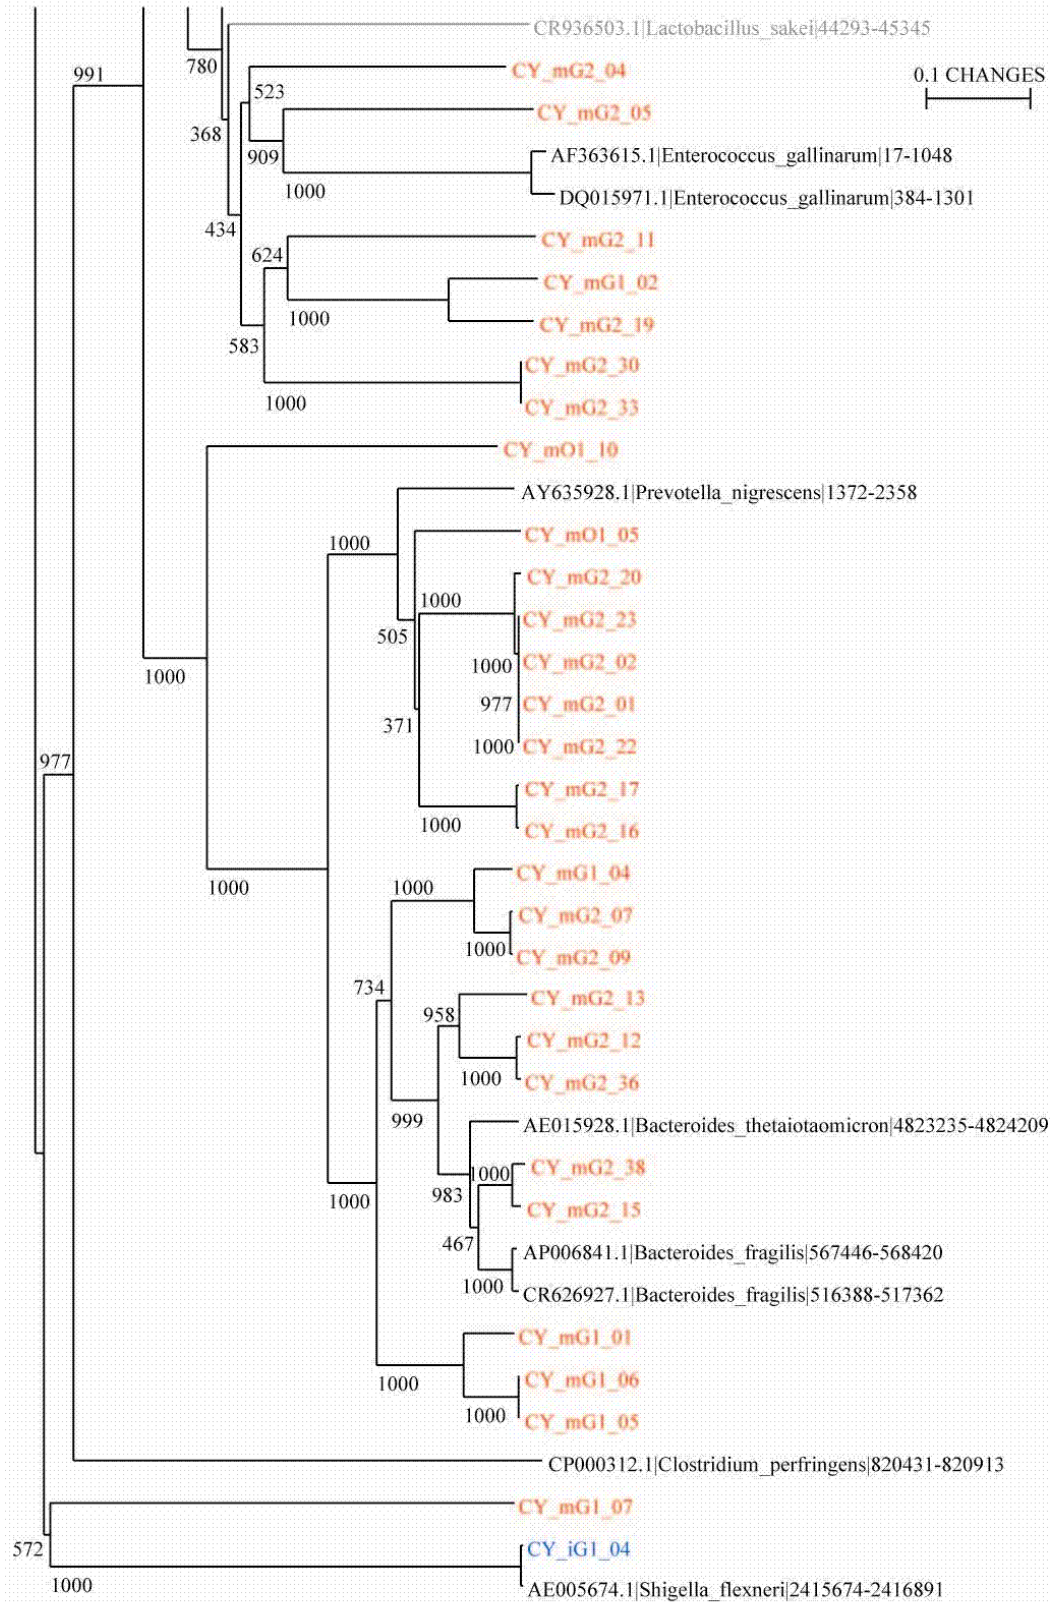

Figure S7: Phylogenetic distribution of full-length gene products encoding resistance to tetracycline antibiotics from human microbiomes. The amino acid sequences for all tetracycline resistance genes encoded within unique inserts derived from functional selections of genomic (blue labels) and metagenomic (red labels) libraries from gut and oral microbiomes from two healthy humans were aligned in ClustalX (8) along with the most closely related genes in GenBank (black labels) (Tables S3 and S4) using the GONNET protein weight matrix. Unrooted phylogenetic trees were generated from ClustalX alignments, using the neighbor-joining algorithm of Saitou and Nei (9) based on the principle of minimum-evolution, along with bootstrap analysis (1000 replicates) in ClustalX, and plotted using NJtree. Bootstrap values are indicated on corresponding branches. Tree branch lengths are proportional to relative sequence identity, and the scale bar is in fixed amino acid substitutions per sequence position.

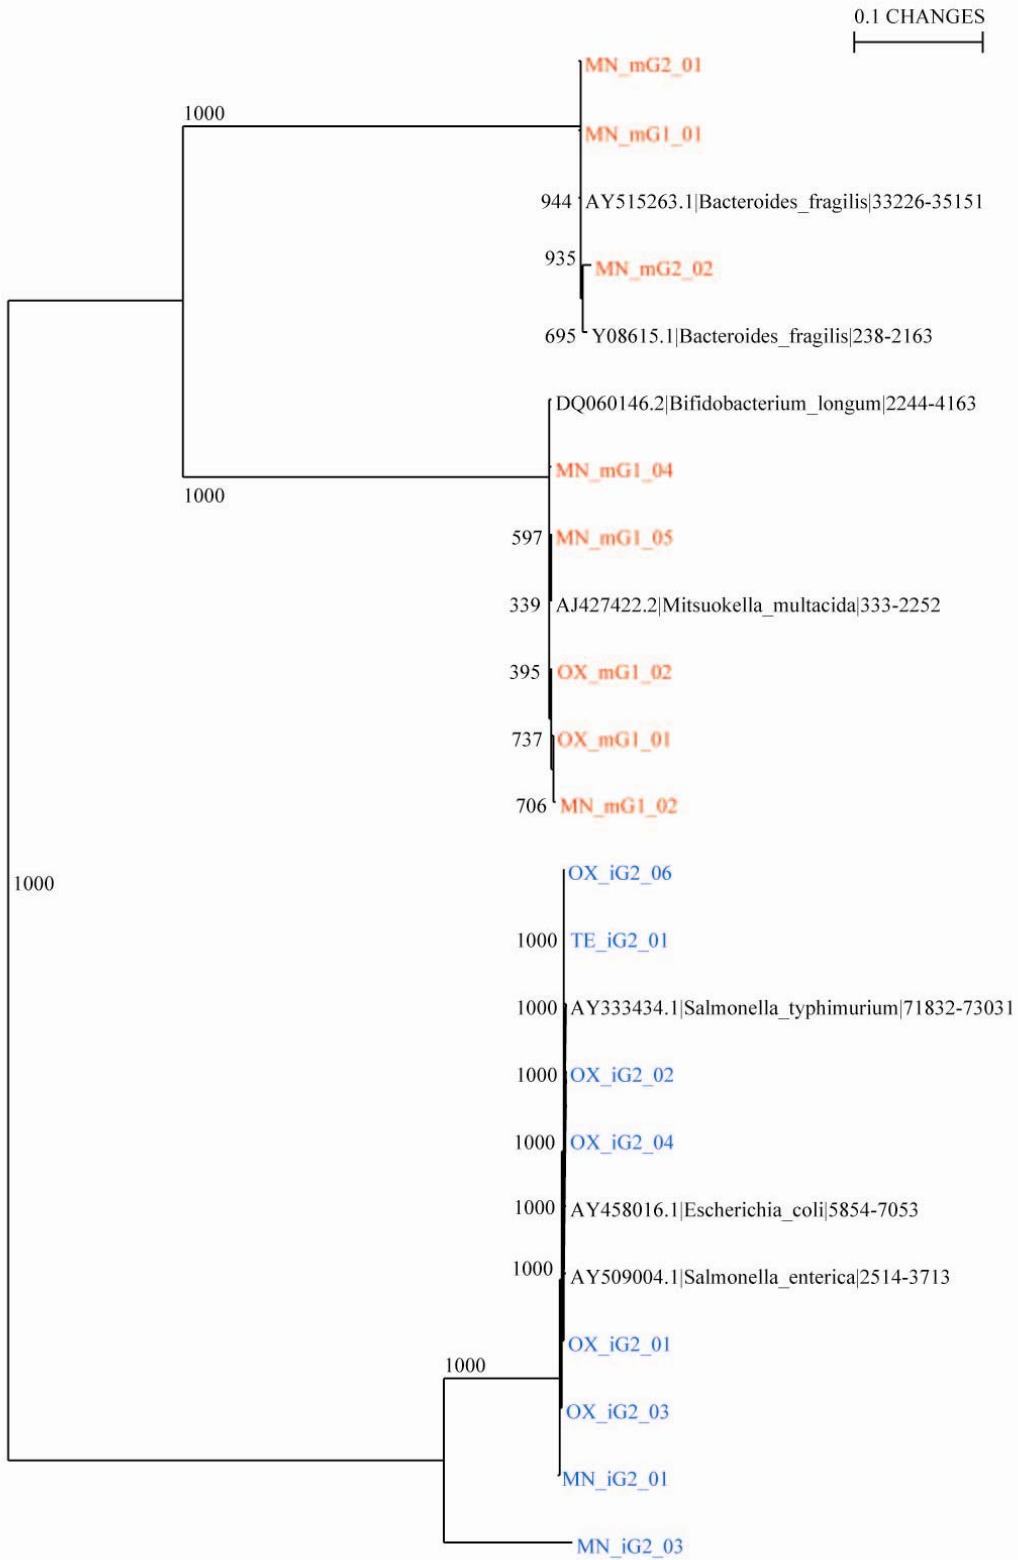

## Supporting Tables

Table S1: Antibiotics used for functional selections of antibiotic resistance machinery from human microbiomes. Concentrations are chosen that prevent growth of *E. coli* TOP10 (Invitrogen)

| Antibiotic      | Code | Concentration (ug/mL) | Class                 | Type           |
|-----------------|------|-----------------------|-----------------------|----------------|
| D-Cycloserine   | CY   | 100                   | Amino acid derivative | Natural        |
| Amikacin        | AM   | 50                    | Aminoglycoside        | Semi-synthetic |
| Gentamicin      | GE   | 50                    | Aminoglycoside        | Natural        |
| Sisomicin       | SI   | 20                    | Aminoglycoside        | Natural        |
| Chloramphenicol | CH   | 20                    | Amphenicol            | Natural        |
| Amoxicillin     | AX   | 20                    | Beta-Lactam           | Semi-synthetic |
| Carbenicillin   | CA   | 50                    | Beta-Lactam           | Semi-synthetic |
| Penicillin G    | PE   | 50                    | Beta-Lactam           | Natural        |
| Piperacillin    | PI   | 50                    | Beta-Lactam           | Semi-synthetic |
| Cefdinir        | CF   | 20                    | Cephalosporin         | Semi-synthetic |
| Minocycline     | MN   | 20                    | Tetracyclines         | Semi-synthetic |
| Oxytetracycline | OX   | 20                    | Tetracyclines         | Natural        |
| Tetracycline    | TE   | 20                    | Tetracyclines         | Natural        |

Table S2: Selected genbank IDs of entries with identified *TEM1* variant and the strain from which it was derived.

| Genbank ID | Pathogenic strain                                  |
|------------|----------------------------------------------------|
| EU780013.1 | <i>Klebsiella pneumoniae</i> strain 12836          |
| EU219534.1 | <i>Salmonella enterica</i> subsp. enterica serovar |
| AB070224.1 | <i>Serratia marcescens</i>                         |
| AM849806.1 | <i>Haemophilus parainfluenzae</i>                  |
| EU213261.1 | <i>Escherichia coli</i>                            |
| AM884335.1 | <i>Haemophilus influenzae</i>                      |
| AF126482.1 | <i>Neisseria meningitidis</i>                      |
| X54607.1   | <i>Pseudomonas aeruginosa</i>                      |

Table S3: Resistance genes identified using metagenomic functional selections from human microbiomes. Gene ID is made up of the 2 letter code for the antibiotics used for the selections (e.g. AX denotes Amoxicillin, see Table S1), an m denoting metagenomic origin of DNA insert, microbiome two letter code (e.g. O1 denotes oral microbiome 1, G2 denotes gut microbiome 2) and) and a numeric identifier. For each gene identified, the most similar gene from any organism as well as the most similar gene harbored by a pathogenic isolate in GenBank was identified using tblastx. Global sequence identities at the nucleotide and amino acid level between these genes were computed using clustalW (3).

| Gene ID   | Gene length [bp] | Gen-bank ID | Gene Annotation           | Top hit [gbID title position]              | Global DNA % ID | Global Protein % ID | Top pathogenic hit [gbID title position]   | Global DNA % ID | Global Protein % ID |
|-----------|------------------|-------------|---------------------------|--------------------------------------------|-----------------|---------------------|--------------------------------------------|-----------------|---------------------|
| AX_mG1_01 | 603              | GQ342997    | beta-lactamase            | L08472.1 Bacteroides_uniformis 848-1738    | 50.8            | 35.7                | AF148067.1 Escherichia_coli 214-1158       | 56.9            | 35.5                |
| AX_mG1_04 | 891              | GQ342998    | beta-lactamase            | L08472.1 Bacteroides_uniformis 848-1738    | 99.9            | 100.0               | AF148067.1 Escherichia_coli 214-1158       | 53.3            | 40.7                |
| AX_mG2_01 | 996              | GQ342996    | CfxA2-like beta-lactamase | AF472622.2 Capnocytophaga_ochracea 53-1018 | 89.1            | 87.2                | AF472622.2 Capnocytophaga_ochracea 53-1018 | 89.1            | 87.2                |
| AX_mG2_03 | 891              | GQ342999    | beta-lactamase            | L08472.1 Bacteroides_uniformis 848-1738    | 99.9            | 99.7                | AF148067.1 Escherichia_coli 214-1158       | 53.4            | 41.0                |
| AX_mG2_05 | 906              | GQ343000    | beta-lactamase            | L08472.1 Bacteroides_uniformis 848-1738    | 61.9            | 58.5                | AF148067.1 Escherichia_coli 214-1158       | 54.1            | 42.2                |
| AX_mG2_07 | 996              | GQ343001    | CfxA2-like beta-lactamase | AF472622.2 Capnocytophaga_ochracea 53-1018 | 89.1            | 87.2                | AF472622.2 Capnocytophaga_ochracea 53-1018 | 89.1            | 87.2                |
| AX_mG2_09 | 873              | GQ343002    | beta-lactamase            | L08472.1 Bacteroides_uniformis 848-1738    | 55.1            | 43.3                | AF148067.1 Escherichia_coli 214-1158       | 52.2            | 37.9                |
| AX_mG2_11 | 891              | GQ343003    | beta-lactamase            | L08472.1 Bacteroides_uniformis 848-1738    | 53.3            | 37.1                | AF339733.1 Chryseobacterium_gleum 437-1315 | 47.0            | 34.3                |
| AX_mO1_01 | 882              | GQ343035    | beta-lactamase            | AF339733.1 Chryseobacterium_gleum 437-1315 | 59.6            | 49.5                | AF339733.1 Chryseobacterium_gleum 437-1315 | 59.6            | 49.5                |
| CA_mG1_01 | 894              | GQ343037    | beta-lactamase            | L13472.1 Bacteroides_fragilis 436-1338     | 57.8            | 48.1                | L13472.1 Bacteroides_fragilis 436-1338     | 57.8            | 48.1                |

|                |                         |                     |                                     |                                                                      |                        |                            |                                                         |                        |                            |
|----------------|-------------------------|---------------------|-------------------------------------|----------------------------------------------------------------------|------------------------|----------------------------|---------------------------------------------------------|------------------------|----------------------------|
| CA_mG1_02      | 903                     | GQ343<br>038        | beta-lactamase                      | L08472.1 Bacteroides_ uniformis 848-1738                             | 65.2                   | 61.4                       | AF148067.1 Escherichia_ coli 214-1158                   | 54.7                   | 43.3                       |
| <b>Gene ID</b> | <b>Gene length [bp]</b> | <b>Gen- bank ID</b> | <b>Gene Annotation</b>              | <b>Top hit [gbID  title  position]</b>                               | <b>Global DNA % ID</b> | <b>Global Protein % ID</b> | <b>Top pathogenic hit [gbID  title  position]</b>       | <b>Global DNA % ID</b> | <b>Global Protein % ID</b> |
| CA_mG1_04      | 894                     | GQ343<br>039        | beta-lactamase                      | AE015928.1 Bacteroides_ s_thetaiotaomicron_VPI -5482 5922082-5922963 | 57.7                   | 51.0                       | AF504912.1 Prevotella_ denticola 1-966                  | 50.8                   | 39.4                       |
| CA_mG1_05      | 894                     | GQ343<br>041        | beta-lactamase                      | L13472.1 Bacteroides_ fragilis 436-1338                              | 57.8                   | 48.1                       | L13472.1 Bacteroides_ fragilis 436-1338                 | 57.8                   | 48.1                       |
| CA_mG1_07      | 891                     | GQ343<br>040        | class A beta lactamase              | L08472.1 Bacteroides_ uniformis 848-1738                             | 99.9                   | 100.0                      | X93314.1 Salmonella_ typhimurium 278-1204               | 50.3                   | 37.4                       |
| CA_mG1_09      | 894                     | GQ343<br>042        | class A beta-lactamase              | L13472.1 Bacteroides_ fragilis 436-1338                              | 57.8                   | 48.1                       | L13472.1 Bacteroides_ fragilis 436-1338                 | 57.8                   | 48.1                       |
| CA_mG2_01      | 822                     | GQ343<br>043        | beta-lactamase                      | L08472.1 Bacteroides_ uniformis 848-1738                             | 99.9                   | 100.0                      | AF148067.1 Escherichia_ coli 214-1158                   | 54.1                   | 43.0                       |
| CA_mG2_04      | 960                     | GQ343<br>044        | beta-lactamase                      | AE015928.1 Bacteroides_ s_thetaiotaomicron_VPI -5482 5922082-5922963 | 59.1                   | 52.9                       | AF148067.1 Escherichia_ coli 214-1158                   | 54.5                   | 39.9                       |
| CA_mG2_07      | 888                     | GQ343<br>045        | metallo-beta-lactamase              | AY372695.1 Bacteroides_ s_fragilis 1787-2536                         | 53.2                   | 42.6                       | AE016879.1 Bacillus anthracis str. Ames 3216832-3217602 | 49.0                   | 30.5                       |
| CA_mG2_10      | 495                     | GQ343<br>036        | CfxA beta-lactamase                 | AY769933.1 Bacteroides_ s_fragilis 1-966                             | 88.9                   | 87.9                       | AF472622.2 Capnocyto phaga_ ochracea 53-1018            | 88.7                   | 87.3                       |
| CA_mG2_12      | 891                     | GQ343<br>046        | class A beta lactamase              | L08472.1 Bacteroides_ uniformis 848-1738                             | 53.3                   | 37.1                       | AF148067.1 Escherichia_ coli 214-1158                   | 47.3                   | 30.8                       |
| CA_mO1_02      | 459                     | GQ343<br>066        | tetracycline resistance protein D   | BX664015.1 Serratia_ marcescens 204138-204554                        | 100.0                  | 100.0                      | BX664015.1 Serratia_ marcescens 204138-204554           | 100.0                  | 100.0                      |
| CF_mG2_01      | 891                     | GQ343<br>068        | beta-lactamase                      | L08472.1 Bacteroides_ uniformis 848-1738                             | 99.9                   | 100.0                      | AF148067.1 Escherichia_ coli 214-1158                   | 53.4                   | 40.7                       |
| CF_mG2_04      | 891                     | GQ343<br>067        | class A beta lactamase              | L08472.1 Bacteroides_ uniformis 848-1738                             | 99.9                   | 100.0                      | AF148067.1 Escherichia_ coli 214-1158                   | 53.4                   | 40.7                       |
| CH_mG2_05      | 624                     | GQ343<br>079        | chloramphenicol O-acetyltransferase | AF031037.1 Neisseria_ meningitidis 489-1112                          | 82.9                   | 81.2                       | AF031037.1 Neisseria_ meningitidis 489-1112             | 82.9                   | 81.2                       |
| CH_mG2_07      | 624                     | GQ343<br>078        | chloramphenicol O-acetyltransferase | AF031037.1 Neisseria_ meningitidis 489-1112                          | 82.9                   | 81.2                       | AF031037.1 Neisseria_ meningitidis 489-1112             | 82.9                   | 81.2                       |

|           |                         |                             |                                  |                                                                  |                        |                            |                                                                                                                 |                        |                            |
|-----------|-------------------------|-----------------------------|----------------------------------|------------------------------------------------------------------|------------------------|----------------------------|-----------------------------------------------------------------------------------------------------------------|------------------------|----------------------------|
| CY_mG1_01 | 981                     | GQ343<br>082                | D-alanyl-alanine<br>synthetase A | AP006841.1 Bacteroides<br>s_fragilis 567446-<br>568420           | 68.7                   | 73.1                       | AE015924.1 Porphyromonas<br>gingivalis 779916-<br>780908                                                        | 58.1                   | 49.4                       |
|           | <b>Gene length [bp]</b> | <b>Gen-<br/>bank<br/>ID</b> | <b>Gene<br/>Annotation</b>       | <b>Top hit<br/>[gbID title position]</b>                         | <b>Global DNA % ID</b> | <b>Global Protein % ID</b> | <b>Top pathogenic hit<br/>[gbID title position]</b>                                                             | <b>Global DNA % ID</b> | <b>Global Protein % ID</b> |
| CY_mG1_02 | 978                     | GQ343<br>084                | D-alanine--D-<br>alanine ligase  | AF363615.1 Enterococcus<br>gallinarum 17-1048                    | 54.7                   | 43.3                       | AF363615.1 Enterococcus<br>gallinarum 17-1048                                                                   | 54.7                   | 43.3                       |
| CY_mG1_03 | 627                     | GQ343<br>085                | D-alanine--D-<br>alanine ligase  | CR936503.1 Lactobacillus<br>sakei_subsp. 44293-<br>45345         | 52.1                   | 31.9                       | AE004091.2 Pseudomonas<br>aeruginosa 470090<br>6-4701946                                                        | 41.1                   | 30.5                       |
| CY_mG1_04 | 966                     | GQ343<br>086                | D-alanyl-alanine<br>synthetase A | AP006841.1 Bacteroides<br>s_fragilis 567446-<br>568420           | 71.4                   | 78.9                       | AP006841.1 Bacteroides<br>s_fragilis 567446-<br>568420                                                          | 71.4                   | 78.9                       |
| CY_mG1_05 | 978                     | GQ343<br>087                | D-alanyl-alanine<br>synthetase A | CR626927.1 Bacteroides<br>s_fragilis_NCTC_9343 5<br>16388-517362 | 68.8                   | 72.2                       | CR626927.1 Bacteroides<br>s_fragilis_NCTC_9343 5<br>16388-517362                                                | 68.8                   | 72.2                       |
| CY_mG1_06 | 978                     | GQ343<br>088                | D-alanyl-alanine<br>synthetase A | CR626927.1 Bacteroides<br>s_fragilis_NCTC_9343 5<br>16388-517362 | 68.8                   | 72.2                       | CR626927.1 Bacteroides<br>s_fragilis_NCTC_9343 5<br>16388-517362                                                | 68.8                   | 72.2                       |
| CY_mG1_07 | 885                     | GQ343<br>083                | aminotransferase, class I/II     | CP000312.1 Clostridium<br>perfringens 820910-<br>822088          | 52.5                   | 54.3                       | CP000312.1 Clostridium<br>perfringens 820910-<br>822088                                                         | 52.5                   | 54.3                       |
| CY_mG2_01 | 996                     | GQ343<br>080                | D-alanyl-alanine<br>synthetase A | AY635928.1 Prevotella<br>nigrescens 1372-2358                    | 69.6                   | 78.4                       | AY635928.1 Prevotella<br>nigrescens 1372-2358                                                                   | 69.6                   | 78.4                       |
| CY_mG2_02 | 996                     | GQ343<br>089                | D-alanyl-alanine<br>synthetase A | AY635928.1 Prevotella<br>nigrescens 1372-2358                    | 69.6                   | 78.4                       | AY635928.1 Prevotella<br>nigrescens 1372-2358                                                                   | 69.6                   | 78.4                       |
| CY_mG2_03 | 106<br>5                | GQ343<br>092                | D-alanine--D-<br>alanine ligase  | AP008230.1 Desulfitobacterium<br>hafniense 18<br>32599-1833684   | 55.7                   | 43.8                       | CP000001.1 Bacillus_cereus_E33L_Bacteria;_Firmicutes;_Bacillales;_Bacillaceae;_Bacillus;_Bacillus 235218-236303 | 53.5                   | 43.2                       |
| CY_mG2_04 | 103<br>2                | GQ343<br>099                | D-alanine--D-<br>alanine ligase  | AF363615.1 Enterococcus<br>gallinarum 17-1048                    | 52.1                   | 46.0                       | AF363615.1 Enterococcus<br>gallinarum 17-1048                                                                   | 52.1                   | 46.0                       |
| CY_mG2_05 | 104<br>7                | GQ343<br>100                | D-alanine--D-<br>alanine ligase  | AF363615.1 Enterococcus<br>gallinarum 17-1048                    | 53.6                   | 47.8                       | AF363615.1 Enterococcus<br>gallinarum 17-1048                                                                   | 53.6                   | 47.8                       |
| CY_mG2_06 | 906                     | GQ343<br>101                | D-alanine--D-<br>alanine ligase  | AE008692.1 Zymomonas<br>mobilis_subsp. 8381<br>21-839086         | 59.3                   | 49.0                       |                                                                                                                 |                        |                            |
| CY_mG2_07 | 975                     | GQ343<br>103                | D-alanine--D-<br>alanine ligase  | AP006841.1 Bacteroides<br>s_fragilis 567446-<br>568420           | 71.7                   | 78.1                       | AP006841.1 Bacteroides<br>s_fragilis 567446-<br>568420                                                          | 71.7                   | 78.1                       |

| Gene ID   | Gene length [bp] | Genbank ID | Gene Annotation               | Top hit [gbID   title   position]                                                                                              | Global DNA % ID | Global Protein % ID | Top pathogenic hit [gbID   title   position]  | Global DNA % ID | Global Protein % ID |
|-----------|------------------|------------|-------------------------------|--------------------------------------------------------------------------------------------------------------------------------|-----------------|---------------------|-----------------------------------------------|-----------------|---------------------|
| CY_mG2_08 | 1101             | GQ343104   | D-alanine--D-alanine ligase   | AP006840.1 Symbiobacterium_thermophilum_IAM_14863_Bacteria;_Firmicutes;_Clostridia;_Clostridiales;_Clostridiales 552572-553672 | 59.9            | 45.7                | AE015927.1 Clostridium_tetani 275925-277001   | 44.4            | 41.9                |
| CY_mG2_09 | 975              | GQ343105   | D-alanine--D-alanine ligase   | AP006841.1 Bacteroides_fragilis 567446-568420                                                                                  | 70.8            | 78.1                | AP006841.1 Bacteroides_fragilis 567446-568420 | 70.8            | 78.1                |
| CY_mG2_10 | 906              | GQ343106   | D-alanine--D-alanine ligase   | AE008692.1 Zymomonas_mobilis_subsp. 838121-839086                                                                              | 59.3            | 49.0                |                                               |                 |                     |
| CY_mG2_11 | 1149             | GQ343107   | D-alanine--D-alanine ligase   | AF363615.1 Enterococcus_gallinarum 17-1048                                                                                     | 54.3            | 42.9                | AF363615.1 Enterococcus_gallinarum 17-1048    | 54.3            | 42.9                |
| CY_mG2_12 | 975              | GQ343108   | D-alanine--D-alanine ligase   | AE015928.1 Bacteroides_thetaiotaomicron_VPI-5482 4823235-4824209                                                               | 76.2            | 84.0                | AY635928.1 Prevotella_nigrescens 1372-2358    | 62.6            | 63.6                |
| CY_mG2_13 | 981              | GQ343109   | D-alanine--D-alanine ligase   | AE015928.1 Bacteroides_thetaiotaomicron_VPI-5482 4823235-4824209                                                               | 77.2            | 86.1                | AY635928.1 Prevotella_nigrescens 1372-2358    | 61.7            | 62.0                |
| CY_mG2_14 | 906              | GQ343110   | D-alanine--D-alanine ligase   | AE008692.1 Zymomonas_mobilis_subsp. 838121-839086                                                                              | 59.3            | 49.0                |                                               |                 |                     |
| CY_mG2_15 | 1026             | GQ343113   | D-alanine--D-alanine ligase   | AE015928.1 Bacteroides_thetaiotaomicron_VPI-5482 4823235-4824209                                                               | 80.4            | 92.3                | AY635928.1 Prevotella_nigrescens 1372-2358    | 63.3            | 63.6                |
| CY_mG2_16 | 999              | GQ343114   | D-alanine--D-alanine ligase   | AY635928.1 Prevotella_nigrescens 1372-2358                                                                                     | 67.1            | 79.9                | AY635928.1 Prevotella_nigrescens 1372-2358    | 67.1            | 79.9                |
| CY_mG2_17 | 999              | GQ343116   | D-alanine--D-alanine ligase   | AY635928.1 Prevotella_nigrescens 1372-2358                                                                                     | 67.2            | 79.9                | AY635928.1 Prevotella_nigrescens 1372-2358    | 67.2            | 79.9                |
| CY_mG2_18 | 1071             | GQ343117   | D-alanine--D-alanine ligase   | AY618461.1 Amycolatopsis_coloradensis 716-1759                                                                                 | 59.5            | 44.5                | AE015927.1 Clostridium_tetani 275925-277001   | 51.4            | 46.7                |
| CY_mG2_19 | 1059             | GQ343118   | D-alanine--D-alanine ligase   | AF363615.1 Enterococcus_gallinarum 17-1048                                                                                     | 53.0            | 43.7                | AF363615.1 Enterococcus_gallinarum 17-1048    | 53.0            | 43.7                |
| CY_mG2_20 | 996              | GQ343081   | D-alanyl-alanine synthetase A | AY635928.1 Prevotella_nigrescens 1372-2358                                                                                     | 69.3            | 77.4                | AY635928.1 Prevotella_nigrescens 1372-2358    | 69.3            | 77.4                |
| CY_mG2_22 | 996              | GQ343090   | D-alanyl-alanine synthetase A | AY635928.1 Prevotella_nigrescens 1372-2358                                                                                     | 69.6            | 78.4                | AY635928.1 Prevotella_nigrescens 1372-2358    | 69.6            | 78.4                |



| Gene ID   | Gene length [bp] | Genbank ID | Gene Annotation               | Top hit [gbID   title   position]                                | Global DNA % ID | Global Protein % ID | Top pathogenic hit [gbID   title   position]          | Global DNA % ID | Global Protein % ID |
|-----------|------------------|------------|-------------------------------|------------------------------------------------------------------|-----------------|---------------------|-------------------------------------------------------|-----------------|---------------------|
| CY_mG2_23 | 980              | GQ343091   | D-alanyl-alanine synthetase A | AY635928.1 Prevotella_nigrescens 1372-2358                       | 69.6            | 78.4                | AY635928.1 Prevotella_nigrescens 1372-2358            | 69.6            | 78.4                |
| CY_mG2_24 | 1065             | GQ343093   | D-alanine--D-alanine ligase   | AP008230.1 Desulfitobacterium_hafniense 1832599-1833684          | 55.7            | 43.8                | AE016879.1 Bacillus anthracis str. Ames 232804-233079 | 55.8            | 41.0                |
| CY_mG2_25 | 1065             | GQ343094   | D-alanine--D-alanine ligase   | AP008230.1 Desulfitobacterium_hafniense 1832599-1833684          | 55.8            | 43.8                | AE016879.1 Bacillus anthracis str. Ames 232804-233079 | 56.2            | 41.0                |
| CY_mG2_26 | 1065             | GQ343095   | D-alanine--D-alanine ligase   | AP008230.1 Desulfitobacterium_hafniense 1832599-1833684          | 55.6            | 43.8                | AE016879.1 Bacillus anthracis str. Ames 232804-233079 | 57.0            | 42.2                |
| CY_mG2_27 | 1065             | GQ343096   | D-alanine--D-alanine ligase   | AP008230.1 Desulfitobacterium_hafniense 1832599-1833684          | 55.7            | 43.8                | AE016879.1 Bacillus anthracis str. Ames 232804-233079 | 55.8            | 41.0                |
| CY_mG2_28 | 1065             | GQ343097   | D-alanine--D-alanine ligase   | AP008230.1 Desulfitobacterium_hafniense 1832599-1833684          | 55.6            | 43.8                | AE016879.1 Bacillus anthracis str. Ames 232804-233079 | 56.2            | 42.2                |
| CY_mG2_29 | 1065             | GQ343098   | D-alanine--D-alanine ligase   | AP008230.1 Desulfitobacterium_hafniense 1832599-1833684          | 55.5            | 43.8                | AE016879.1 Bacillus anthracis str. Ames 232804-233079 | 56.2            | 42.2                |
| CY_mG2_30 | 1104             | GQ343102   | D-alanine--D-alanine ligase   | DQ015971.1 Enterococcus_gallinarum 270-1301                      | 58.6            | 41.3                | AE016879.1 Bacillus anthracis str. Ames 232804-233079 | 58.6            | 41.3                |
| CY_mG2_33 | 1104             | GQ343111   | D-alanine--D-alanine ligase   | DQ015971.1 Enterococcus_gallinarum 270-1301                      | 58.6            | 41.3                | DQ015971.1 Enterococcus_gallinarum 270-1301           | 58.6            | 41.3                |
| CY_mG2_36 | 975              | GQ343112   | D-alanyl-alanine synthetase A | AE015928.1 Bacteroides_thetaiotaomicron_VPI-5482 4823235-4824209 | 76.4            | 84.6                | AY635928.1 Prevotella_nigrescens 1372-2358            | 62.8            | 64.2                |
| CY_mG2_38 | 1032             | GQ343115   | D-alanyl-alanine synthetase A | AE015928.1 Bacteroides_thetaiotaomicron_VPI-5482 4823235-4824209 | 80.0            | 91.4                | AY635928.1 Prevotella_nigrescens 1372-2358            | 62.9            | 62.7                |
| CY_mO1_01 | 1119             | GQ343124   | D-alanine--D-alanine ligase   | AL939124.1 Streptomyces_coelicolor_A3(2) 77385-78554             | 64.5            | 53.4                | AE017283.1 Propionibacterium_acnes 1483346-1484443    | 59.0            | 50.3                |
| CY_mO1_02 | 1119             | GQ343126   | D-alanine--D-alanine ligase   | AL939124.1 Streptomyces_coelicolor_A3(2) 77385-78554             | 64.4            | 53.1                | AE017283.1 Propionibacterium_acnes 1483346-1484443    | 58.9            | 50.5                |

| Gene ID   | Gene length [bp] | Genbank ID | Gene Annotation                      | Top hit [gbID   title   position]                           | Global DNA % ID | Global Protein % ID | Top pathogenic hit [gbID   title   position]               | Global DNA % ID | Global Protein % ID |
|-----------|------------------|------------|--------------------------------------|-------------------------------------------------------------|-----------------|---------------------|------------------------------------------------------------|-----------------|---------------------|
| CY_mO1_03 | 933              | GQ343127   | D-alanine--D-alanine ligase          | CP000142.2 Pelobacter_carbinolicus_DSM_2380 2570162-2571079 | 53.7            | 44.7                | AE006049.1 Pasteurella_multocida_subsp. 2602-3531          | 51.4            | 39.0                |
| CY_mO1_04 | 1119             | GQ343128   | D-alanine--D-alanine ligase          | AL939124.1 Streptomyces_coelicolor_A3(2) 77385-78554        | 64.4            | 53.1                | AE017283.1 Propionibacterium_acnes 1483346-1484443         | 58.9            | 50.5                |
| CY_mO1_05 | 1005             | GQ343129   | D-alanine--D-alanine ligase          | AY635928.1 Prevotella_nigrescens 1372-2358                  | 68.2            | 74.7                | AY635928.1 Prevotella_nigrescens 1372-2358                 | 68.2            | 74.7                |
| CY_mO1_06 | 915              | GQ343133   | D-alanine--D-alanine ligase          | AE002098.2 Neisseria_meningitidis 434089-435003             | 84.3            | 93.1                | AE002098.2 Neisseria_meningitidis 434089-435003            | 84.3            | 93.1                |
| CY_mO1_07 | 1119             | GQ343125   | D-alanine--D-alanine ligase          | AL939124.1 Streptomyces_coelicolor_A3(2) 77385-78554        | 64.5            | 53.4                | AB186053.1 Enterococcus_faecalis 1-1071                    | 48.6            | 41.3                |
| CY_mO1_08 | 1119             | GQ343130   | D-alanine--D-alanine ligase          | AL939124.1 Streptomyces_coelicolor_A3(2) 77385-78554        | 64.4            | 53.1                | M20793.1 Salmonella_typhimurium 100-1194                   | 52.7            | 39.7                |
| CY_mO1_09 | 1347             | GQ343131   | D-alanine/D-serine/glycine permease  | CP000431.1 Rhodococcus_sp. 2396791-2398263                  | 67.6            | 61.2                | AE005174.2 Escherichia_coli_O157:H7_EDL933 5315324-5316736 | 60.5            | 58.2                |
| CY_mO1_10 | 978              | GQ343132   | D-alanyl-alanine synthetase A        | AP006841.1 Bacteroides_fragilis 567446-568420               | 54.4            | 41.9                | AP006841.1 Bacteroides_fragilis 567446-568420              | 54.4            | 41.9                |
| MN_mG1_01 | 1926             | GQ343137   | TetQ                                 | AY515263.1 Bacteroides_fragilis 33226-35151                 | 100.0           | 100.0               | AY515263.1 Bacteroides_fragilis 33226-35151                | 100.0           | 100.0               |
| MN_mG1_02 | 888              | GQ343139   | TetW                                 | AJ427422.2 Mitsuokella_multacida 333-2252                   | 100.0           | 100.0               | AY466395.1 Streptococcus_pneumoniae 4-1923                 | 65.8            | 75.6                |
| MN_mG1_04 | 1920             | GQ343140   | TetW                                 | DQ060146.2 Bifidobacterium_longum 2244-4163                 | 99.9            | 99.7                | AY466395.1 Streptococcus_pneumoniae 4-1923                 | 63.7            | 68.1                |
| MN_mG1_05 | 1920             | GQ343138   | Tetracycline resistance protein tetW | DQ060146.2 Bifidobacterium_longum 2244-4163                 | 99.9            | 99.8                | Y07780.1 Streptococcus_pneumoniae 125-2044                 | 65.2            | 67.9                |
| MN_mG2_01 | 1926             | GQ343141   | TetQ                                 | Y08615.1 Bacteroides_fragilis 238-2163                      | 100.0           | 100.0               | L42544.1 Streptococcus_pyogenes 478-2433                   | 56.1            | 48.3                |
| MN_mG2_02 | 1656             | GQ343142   | TetA(Q)                              | Y08615.1 Bacteroides_fragilis 238-2163                      | 99.8            | 99.6                | L42544.1 Streptococcus_pyogenes 478-2433                   | 54.6            | 44.5                |

| Gene ID   | Gene length [bp] | Genbank ID | Gene Annotation                               | Top hit [gbID   title   position]                            | Global DNA % ID | Global Protein % ID | Top pathogenic hit [gbID   title   position]            | Global DNA % ID | Global Protein % ID |
|-----------|------------------|------------|-----------------------------------------------|--------------------------------------------------------------|-----------------|---------------------|---------------------------------------------------------|-----------------|---------------------|
| OX_mG1_01 | 1920             | GQ343145   | Tetracycline resistance protein tetW          | DQ060146.2 Bifidobacterium_longum 2244-4163                  | 99.6            | 99.4                | Y07780.1 Streptococcus_pneumoniae 125-2044              | 65.0            | 67.4                |
| OX_mG1_02 | 1920             | GQ343146   | Tetracycline resistance protein tetW          | DQ060146.2 Bifidobacterium_longum 2244-4163                  | 99.6            | 99.5                | Y07780.1 Streptococcus_pneumoniae 125-2044              | 65.0            | 67.6                |
| PE_mG1_01 | 921              | GQ343153   | class A beta lactamase                        | L08472.1 Bacteroides_uniformis 848-1738                      | 51.7            | 38.8                | AF148067.1 Escherichia_coli 214-1158                    | 55.0            | 35.5                |
| PE_mG2_02 | 891              | GQ343154   | class A beta-lactamase                        | L08472.1 Bacteroides_uniformis 848-1738                      | 99.2            | 99.0                | AF148067.1 Escherichia_coli 214-1158                    | 53.3            | 40.7                |
| PI_mG1_01 | 909              | GQ343170   | hypothetical protein - virulence factor       | BX571856.1 Staphylococcus_aureus_subsp. 1618968-1621415      | 46.8            | 34.5                | BX571856.1 Staphylococcus_aureus_subsp. 1618968-1621415 | 46.8            | 34.5                |
| PI_mG2_01 | 876              | GQ343169   | extended-spectrum beta-lactamase CTX-M-15     | DQ485310.1 Escherichia_coli 38-913                           | 100.0           | 100.0               | DQ485310.1 Escherichia_coli 38-913                      | 100.0           | 100.0               |
| SI_mG2_01 | 432              | GQ343182   | 6'-N-acetyltransferase                        | AB119105.1 Acinetobacter_genomosp. 1-435                     | 53.2            | 47.6                | AB119105.1 Acinetobacter_genomosp. 1-435                | 53.2            | 47.6                |
| SI_mG2_02 | 432              | GQ343178   | 6'-N-acetyltransferase                        | AB119105.1 Acinetobacter_genomosp. 1-435                     | 53.2            | 47.6                | AB119105.1 Acinetobacter_genomosp. 1-435                | 53.2            | 47.6                |
| SI_mG2_03 | 600              | GQ343181   | methyltransferase type 11                     | AE011788.1 Xanthomonas_axonopodis_pv_citri_str_306 4237-5232 | 43.1            | 26.3                | AE014075.1 Escherichia_coli 243401-244171               | 42.8            | 20.6                |
| SI_mG2_06 | 432              | GQ343179   | aminoglycoside N(6')-acetyltransferase type 1 | AB119105.1 Acinetobacter_genomosp. 1-435                     | 53.2            | 47.6                | AB119105.1 Acinetobacter_genomosp. 1-435                | 53.2            | 47.6                |
| SI_mG2_08 | 432              | GQ343180   | aminoglycoside N(6')-acetyltransferase type 1 | AB119105.1 Acinetobacter_genomosp. 1-435                     | 53.2            | 47.6                | AB119105.1 Acinetobacter_genomosp. 1-435                | 53.2            | 47.6                |
| SI_mG2_10 | 432              | GQ343183   | aminoglycoside N(6')-acetyltransferase type 1 | AB119105.1 Acinetobacter_genomosp. 1-435                     | 53.2            | 47.6                | AB119105.1 Acinetobacter_genomosp. 1-435                | 53.2            | 47.6                |
| SI_mO1_01 | 429              | GQ343186   | aminoglycoside 6'-N-acetyltransferase         | AB119105.1 Acinetobacter_genomosp. 1-435                     | 60.1            | 45.8                | AE014613.1 Salmonella_enterica_subsp. 1582846-1583364   | 48.7            | 37.3                |

Table S4: Resistance genes identified using functional selections from cultured aerobic gut microbiome isolates. Gene ID is made up of the 2 letter code for the antibiotics used for the selections (e.g. AX denotes Amoxicillin, see Table S1), an i denoting cultured isolate origin of DNA insert, microbiome two letter code (e.g. G1 denotes gut microbiome 1) and a numeric identifier. For each gene identified, the most similar gene from any organism as well as the most similar gene harbored by a pathogenic isolate in GenBank was identified using tblastx. Global sequence identities at the nucleotide and amino acid level between these hit genes were computed using clustalW (3).

| Gene ID   | Gene length [bp] | Gen-bank ID | Gene Annotation                                   | Top hit [gbID title position]                                | Global DNA % ID | Global Protein % ID | Top pathogenic hit [gbID title position]                     | Global DNA % ID | Global Protein % ID |
|-----------|------------------|-------------|---------------------------------------------------|--------------------------------------------------------------|-----------------|---------------------|--------------------------------------------------------------|-----------------|---------------------|
| AM_iG1_01 | 711              | GQ342979    | putative efflux pump                              | BA000007.2 Escherichia coli_O157:H7_str._Sakai 218601-219311 | 96.9            | 99.6                | BA000007.2 Escherichia coli_O157:H7_str._Sakai 218601-219311 | 96.9            | 99.6                |
| AM_iG1_03 | 600              | GQ342980    | aminoglycoside 6'-N-acetyl transferase type Ib-cr | AY458016.1 Escherichia coli 11679-12278                      | 100.0           | 100.0               | AY509609.1 Pseudomonas aeruginosa 1075-1593                  | 99.6            | 98.8                |
| AM_iG1_06 | 711              | GQ342983    | putative efflux pump                              | BA000007.2 Escherichia coli_O157:H7_str._Sakai 218601-219311 | 94.4            | 98.3                | BA000007.2 Escherichia coli_O157:H7_str._Sakai 218601-219311 | 94.4            | 98.3                |
| AM_iG1_07 | 600              | GQ342978    | aminoglycoside 6'-N-acetyl transferase type Ib-cr | AY458016.1 Escherichia coli 11679-12278                      | 100.0           | 100.0               | AY458016.1 Escherichia coli 11679-12278                      | 100.0           | 100.0               |
| AM_iG1_11 | 711              | GQ342981    | putative efflux pump                              | BA000007.2 Escherichia coli_O157:H7_str._Sakai 218601-219311 | 96.9            | 99.6                | BA000007.2 Escherichia coli_O157:H7_str._Sakai 218601-219311 | 96.9            | 99.6                |
| AM_iG1_13 | 447              | GQ342984    | putative efflux pump                              | CP000247.1 Escherichia coli 219476-220186                    | 95.7            | 100.0               | CP000247.1 Escherichia coli 219476-220186                    | 95.7            | 100.0               |
| AM_iG1_15 | 786              | GQ342985    | putative permease, membrane transport protein     | CP000247.1 Escherichia coli 835762-836466                    | 99.0            | 100.0               | CP000247.1 Escherichia coli 835762-836466                    | 99.0            | 100.0               |
| AM_iG1_19 | 600              | GQ342986    | aminoglycoside 6'-N-acetyl transferase type Ib-cr | AY458016.1 Escherichia coli 11679-12278                      | 100.0           | 100.0               | AY458016.1 Escherichia coli 11679-12278                      | 100.0           | 100.0               |

| Gene ID   | Gene length [bp] | Gen-bank ID | Gene Annotation                                                                              | Top hit [gbID title position]                     | Global DNA % ID | Global Protein % ID | Top pathogenic hit [gbID title position]          | Global DNA % ID | Global Protein % ID |
|-----------|------------------|-------------|----------------------------------------------------------------------------------------------|---------------------------------------------------|-----------------|---------------------|---------------------------------------------------|-----------------|---------------------|
| AM_iG1_21 | 672              | GQ342987    | putative efflux pump                                                                         | CP000247.1 Escherichia_coli 219476-220186         | 95.8            | 98.7                | CP000247.1 Escherichia_coli 219476-220186         | 95.8            | 98.7                |
| AM_iG2_01 | 537              | GQ342992    | Ribosomal RNA small subunit methyltransferase F (rRNA (cytosine-C(5)-methyltransferase rsmF) | CP000247.1 Escherichia_coli 1832067-1833512       | 99.8            | 99.4                | CP000247.1 Escherichia_coli 1832067-1833512       | 99.8            | 99.4                |
| AM_iG2_05 | 483              | GQ342988    | putative efflux pump                                                                         | AL627266.1 Salmonella_enterica_subsp. 28279-28980 | 79.6            | 86.9                | AL627266.1 Salmonella_enterica_subsp. 28279-28980 | 79.6            | 86.9                |
| AM_iG2_07 | 711              | GQ342989    | putative efflux pump                                                                         | CP000247.1 Escherichia_coli 219476-220186         | 100.0           | 100.0               | CP000247.1 Escherichia_coli 219476-220186         | 100.0           | 100.0               |
| AM_iG2_11 | 711              | GQ342990    | putative efflux pump                                                                         | CP000247.1 Escherichia_coli 219476-220186         | 100.0           | 100.0               | CP000247.1 Escherichia_coli 219476-220186         | 100.0           | 100.0               |
| AM_iG2_12 | 578              | GQ342991    | putative efflux pump                                                                         | CP000247.1 Escherichia_coli 219476-220186         | 100.0           | 100.0               | CP000247.1 Escherichia_coli 219476-220186         | 100.0           | 100.0               |
| AM_iG2_15 | 711              | GQ342993    | putative efflux pump                                                                         | CP000247.1 Escherichia_coli 219476-220186         | 100.0           | 100.0               | CP000247.1 Escherichia_coli 219476-220186         | 100.0           | 100.0               |
| AM_iG2_17 | 654              | GQ342994    | putative efflux pump                                                                         | AL627266.1 Salmonella_enterica_subsp. 28279-28980 | 76.7            | 82.5                | AL627266.1 Salmonella_enterica_subsp. 28279-28980 | 76.7            | 82.5                |
| AM_iG2_19 | 711              | GQ342995    | putative efflux pump                                                                         | CP000247.1 Escherichia_coli 219476-220186         | 100.0           | 100.0               | CP000247.1 Escherichia_coli 219476-220186         | 100.0           | 100.0               |
| AX_iG1_01 | 861              | GQ343004    | TEM beta-lactamase                                                                           | AY123253.3 Klebsiella_pneumoniae 24558-25418      | 100.0           | 100.0               | AY123253.3 Klebsiella_pneumoniae 24558-25418      | 100.0           | 100.0               |
| AX_iG1_04 | 876              | GQ343005    | CTX-M beta-lactamase                                                                         | AY604722.1 Escherichia_coli 634-1509              | 100.0           | 100.0               | AY604722.1 Escherichia_coli 634-1509              | 100.0           | 100.0               |
| AX_iG1_06 | 861              | GQ343006    | TEM beta-lactamase                                                                           | AY123253.3 Klebsiella_pneumoniae 24558-25418      | 100.0           | 100.0               | AY123253.3 Klebsiella_pneumoniae 24558-25418      | 100.0           | 100.0               |
| AX_iG1_08 | 864              | GQ343007    | CTX-M beta-lactamase                                                                         | AY604722.1 Escherichia_coli 634-1509              | 100.0           | 100.0               | AY604722.1 Escherichia_coli 634-1509              | 100.0           | 100.0               |

| Gene ID   | Gene length [bp] | Genbank ID | Gene Annotation         | Top hit [gbID title position]                                     | Global DNA % ID | Global Protein % ID | Top pathogenic hit [gbID title position]          | Global DNA % ID | Global Protein % ID |
|-----------|------------------|------------|-------------------------|-------------------------------------------------------------------|-----------------|---------------------|---------------------------------------------------|-----------------|---------------------|
| AX_iG2_01 | 1263             | GQ343016   | beta-lactamase          | CP000247.1 Escherichia_coli 4607984-4609246                       | 100.0           | 100.0               | CP000247.1 Escherichia_coli 4607984-4609246       | 100.0           | 100.0               |
| AX_iG2_02 | 891              | GQ343019   | beta-lactamase          | L08472.1 Bacteroides_uniformis 848-1738                           | 99.9            | 100.0               | AF148067.1 Escherichia_coli 214-1158              | 53.4            | 40.7                |
| AX_iG2_03 | 1146             | GQ343034   | beta-lactamase class C  | D13207.1 Citrobacter_f_reundii 143-1288                           | 99.4            | 99.5                | AY509004.1 Salmonella_enterica_subsp. 69966-71195 | 95.3            | 97.4                |
| AX_iG2_04 | 1263             | GQ343008   | AmpC beta-lactamase     | U00096.2 Escherichia_coli_str._K12_substr._MG1655 4375834-4376967 | 100.0           | 100.0               | AE014075.1 Escherichia_coli 4986532-4987698       | 98.2            | 98.5                |
| AX_iG2_05 | 1146             | GQ343009   | CMY AmpC beta-lactamase | D13207.1 Citrobacter_f_reundii 143-1288                           | 99.4            | 99.5                | D13207.1 Citrobacter_f_reundii 143-1288           | 99.4            | 99.5                |
| AX_iG2_08 | 1167             | GQ343010   | AmpC beta-lactamase     | U00096.2 Escherichia_coli_str._K12_substr._MG1655 4375834-4376967 | 100.0           | 100.0               | AE014075.1 Escherichia_coli 4986532-4987698       | 98.2            | 98.5                |
| AX_iG2_10 | 861              | GQ343011   | TEM beta-lactamase      | AY883411.1 Salmonella_enterica_subsp. 167-1027                    | 99.7            | 99.0                | AY883411.1 Salmonella_enterica_subsp. 167-1027    | 99.7            | 99.0                |
| AX_iG2_12 | 861              | GQ343012   | TEM beta-lactamase      | AY883411.1 Salmonella_enterica_subsp. 167-1027                    | 99.7            | 99.0                | AY883411.1 Salmonella_enterica_subsp. 167-1027    | 99.7            | 99.0                |
| AX_iG2_14 | 1263             | GQ343013   | AmpC beta-lactamase     | U00096.2 Escherichia_coli_str._K12_substr._MG1655 4375834-4376967 | 100.0           | 100.0               | AE014075.1 Escherichia_coli 4986532-4987698       | 98.2            | 98.5                |
| AX_iG2_15 | 861              | GQ343014   | TEM beta-lactamase      | AY883411.1 Salmonella_enterica_subsp. 167-1027                    | 99.7            | 99.0                | AY883411.1 Salmonella_enterica_subsp. 167-1027    | 99.7            | 99.0                |
| AX_iG2_17 | 1263             | GQ343015   | AmpC beta-lactamase     | DQ092423.1 Escherichia_coli 185-1318                              | 100.0           | 100.0               | DQ092423.1 Escherichia_coli 185-1318              | 100.0           | 100.0               |
| AX_iG2_19 | 861              | GQ343017   | TEM beta-lactamase      | AY883411.1 Salmonella_enterica_subsp. 167-1027                    | 99.7            | 99.0                | AY883411.1 Salmonella_enterica_subsp. 167-1027    | 99.7            | 99.0                |

| Gene ID   | Gene length [bp] | Genbank ID | Gene Annotation         | Top hit [gbID title position]                                   | Global DNA % ID | Global Protein % ID | Top pathogenic hit [gbID title position]       | Global DNA % ID | Global Protein % ID |
|-----------|------------------|------------|-------------------------|-----------------------------------------------------------------|-----------------|---------------------|------------------------------------------------|-----------------|---------------------|
| AX_iG2_21 | 1146             | GQ343018   | CMY AmpC beta-lactamase | AF349569.1 Citrobacter_freundii 1-1146                          | 99.2            | 99.7                | AF349569.1 Citrobacter_freundii 1-1146         | 99.2            | 99.7                |
| AX_iG2_24 | 861              | GQ343020   | TEM beta-lactamase      | AY883411.1 Salmonella_enterica_subsp. 167-1027                  | 99.7            | 99.0                | AY883411.1 Salmonella_enterica_subsp. 167-1027 | 99.7            | 99.0                |
| AX_iG2_26 | 699              | GQ343021   | AmpC beta-lactamase     | CP000247.1 Escherichia_coli 4607984-4609246                     | 100.0           | 100.0               | CP000247.1 Escherichia_coli 4607984-4609246    | 100.0           | 100.0               |
| AX_iG2_29 | 1146             | GQ343022   | CMY AmpC beta-lactamase | AF349569.1 Citrobacter_freundii 1-1146                          | 99.2            | 99.7                | AF349569.1 Citrobacter_freundii 1-1146         | 99.2            | 99.7                |
| AX_iG2_31 | 1146             | GQ343023   | CMY AmpC beta-lactamase | AF349569.1 Citrobacter_freundii 1-1146                          | 99.2            | 99.7                | AF349569.1 Citrobacter_freundii 1-1146         | 99.2            | 99.7                |
| AX_iG2_33 | 861              | GQ343024   | TEM beta-lactamase      | AY883411.1 Salmonella_enterica_subsp. 167-1027                  | 99.7            | 99.0                | AY883411.1 Salmonella_enterica_subsp. 167-1027 | 99.7            | 99.0                |
| AX_iG2_35 | 1263             | GQ343025   | AmpC beta-lactamase     | DQ092423.1 Escherichia_coli 185-1318                            | 100.0           | 100.0               | DQ092423.1 Escherichia_coli 185-1318           | 100.0           | 100.0               |
| AX_iG2_36 | 1263             | GQ343026   | AmpC beta-lactamase     | U00096.2 Escherichia_coli_str_K12_substr_MG1655 4375834-4376967 | 100.0           | 100.0               | AE014075.1 Escherichia_coli 4986532-4987698    | 98.2            | 98.5                |
| AX_iG2_38 | 1256             | GQ343027   | AmpC beta-lactamase     | CP000247.1 Escherichia_coli 4607984-4609246                     | 100.0           | 100.0               | CP000247.1 Escherichia_coli 4607984-4609246    | 100.0           | 100.0               |
| AX_iG2_39 | 720              | GQ343028   | CMY AmpC beta-lactamase | D13207.1 Citrobacter_freundii 143-1288                          | 99.2            | 92.9                | D13207.1 Citrobacter_freundii 143-1288         | 99.2            | 92.9                |
| AX_iG2_43 | 1263             | GQ343029   | AmpC beta-lactamase     | DQ092423.1 Escherichia_coli 185-1318                            | 100.0           | 100.0               | DQ092423.1 Escherichia_coli 185-1318           | 100.0           | 100.0               |
| AX_iG2_44 | 783              | GQ343030   | AmpC beta-lactamase     | AE014075.1 Escherichia_coli 4986532-4987698                     | 100.0           | 100.0               | AE014075.1 Escherichia_coli 4986532-4987698    | 100.0           | 100.0               |
| AX_iG2_47 | 1263             | GQ343031   | AmpC beta-lactamase     | U00096.2 Escherichia_coli_str_K12_substr_MG1655 4375834-4376967 | 100.0           | 100.0               | AE014075.1 Escherichia_coli 4986532-4987698    | 98.2            | 98.5                |
| AX_iG2_48 | 861              | GQ343032   | TEM beta-lactamase      | AY883411.1 Salmonella_enterica_subsp. 167-1027                  | 99.7            | 99.0                | AY883411.1 Salmonella_enterica_subsp. 167-1027 | 99.7            | 99.0                |

| Gene ID   | Gene length [bp] | Genbank ID | Gene Annotation                          | Top hit [gbID title position]                                  | Global DNA % ID | Global Protein % ID | Top pathogenic hit [gbID title position]                       | Global DNA % ID | Global Protein % ID |
|-----------|------------------|------------|------------------------------------------|----------------------------------------------------------------|-----------------|---------------------|----------------------------------------------------------------|-----------------|---------------------|
| AX_iG2_52 | 861              | GQ343033   | TEM beta-lactamase                       | AY883411.1 Salmonella_enterica_subsp. 167-1027                 | 99.7            | 99.0                | AY883411.1 Salmonella_enterica_subsp. 167-1027                 | 99.7            | 99.0                |
| CA_iG1_01 | 861              | GQ343047   | TEM beta-lactamase                       | AY123253.3 Klebsiella_pneumoniae 24558-25418                   | 100.0           | 100.0               | AY123253.3 Klebsiella_pneumoniae 24558-25418                   | 100.0           | 100.0               |
| CA_iG1_02 | 876              | GQ343048   | class A extended-spectrum beta-lactamase | AY604722.1 Escherichia_coli 634-1509                           | 100.0           | 100.0               | AY604722.1 Escherichia_coli 634-1509                           | 100.0           | 100.0               |
| CA_iG1_03 | 861              | GQ343049   | TEM beta-lactamase                       | AY123253.3 Klebsiella_pneumoniae 24558-25418                   | 100.0           | 100.0               | AY123253.3 Klebsiella_pneumoniae 24558-25418                   | 100.0           | 100.0               |
| CA_iG1_04 | 855              | GQ343053   | TEM beta-lactamase                       | AY123253.3 Klebsiella_pneumoniae 24558-25418                   | 100.0           | 100.0               | AY123253.3 Klebsiella_pneumoniae 24558-25418                   | 100.0           | 100.0               |
| CA_iG1_05 | 861              | GQ343054   | TEM beta-lactamase                       | AY123253.3 Klebsiella_pneumoniae 24558-25418                   | 100.0           | 100.0               | AY123253.3 Klebsiella_pneumoniae 24558-25418                   | 100.0           | 100.0               |
| CA_iG1_06 | 1263             | GQ343055   | beta-lactamase                           | BA000007.2 Escherichia_coli_O157:H7_str._Sakai 5232091-5233224 | 98.9            | 99.2                | BA000007.2 Escherichia_coli_O157:H7_str._Sakai 5232091-5233224 | 98.9            | 99.2                |
| CA_iG1_07 | 861              | GQ343050   | TEM beta-lactamase                       | AY123253.3 Klebsiella_pneumoniae 24558-25418                   | 100.0           | 100.0               | AY123253.3 Klebsiella_pneumoniae 24558-25418                   | 100.0           | 100.0               |
| CA_iG1_09 | 876              | GQ343051   | CTX-M beta-lactamase                     | AY604722.1 Escherichia_coli 634-1509                           | 100.0           | 100.0               | AY604722.1 Escherichia_coli 634-1509                           | 100.0           | 100.0               |
| CA_iG1_11 | 876              | GQ343052   | CTX-M beta-lactamase                     | AY604722.1 Escherichia_coli 634-1509                           | 100.0           | 100.0               | AY604722.1 Escherichia_coli 634-1509                           | 100.0           | 100.0               |
| CA_iG2_01 | 1263             | GQ343060   | beta-lactamase                           | DQ092423.1 Escherichia_coli 185-1318                           | 100.0           | 100.0               | DQ092423.1 Escherichia_coli 185-1318                           | 100.0           | 100.0               |
| CA_iG2_02 | 861              | GQ343063   | TEM beta-lactamase                       | AY883411.1 Salmonella_enterica_subsp. 167-1027                 | 99.7            | 99.0                | AY883411.1 Salmonella_enterica_subsp. 167-1027                 | 99.7            | 99.0                |
| CA_iG2_04 | 861              | GQ343064   | TEM beta-lactamase                       | AY883411.1 Salmonella_enterica_subsp. 167-1027                 | 99.7            | 99.0                | AY883411.1 Salmonella_enterica_subsp. 167-1027                 | 99.7            | 99.0                |



| Gene ID   | Gene length [bp] | Gen-bank ID | Gene Annotation                           | Top hit [gbID title position]                  | Global DNA % ID | Global Protein % ID | Top pathogenic hit [gbID title position]       | Global DNA % ID | Global Protein % ID |
|-----------|------------------|-------------|-------------------------------------------|------------------------------------------------|-----------------|---------------------|------------------------------------------------|-----------------|---------------------|
| CA_iG2_06 | 1146             | GQ343056    | CMY AmpC beta-lactamase                   | AF349569.1 Citrobacter_freundii 1-1146         | 99.2            | 99.7                | AF349569.1 Citrobacter_freundii 1-1146         | 99.2            | 99.7                |
| CA_iG2_08 | 1263             | GQ343057    | AmpC beta-lactamase                       | DQ092423.1 Escherichia_coli 185-1318           | 100.0           | 100.0               | DQ092423.1 Escherichia_coli 185-1318           | 100.0           | 100.0               |
| CA_iG2_10 | 1146             | GQ343058    | CMY AmpC beta-lactamase                   | AF349569.1 Citrobacter_freundii 1-1146         | 99.2            | 99.7                | AF349569.1 Citrobacter_freundii 1-1146         | 99.2            | 99.7                |
| CA_iG2_12 | 1146             | GQ343059    | CMY AmpC beta-lactamase                   | D13207.1 Citrobacter_freundii 143-1288         | 99.4            | 99.5                | D13207.1 Citrobacter_freundii 143-1288         | 99.4            | 99.5                |
| CA_iG2_14 | 1146             | GQ343061    | CMY AmpC beta-lactamase                   | AF349569.1 Citrobacter_freundii 1-1146         | 99.2            | 99.7                | AF349569.1 Citrobacter_freundii 1-1146         | 99.2            | 99.7                |
| CA_iG2_17 | 861              | GQ343062    | TEM beta-lactamase                        | AY883411.1 Salmonella_enterica_subsp. 167-1027 | 99.7            | 99.0                | AY883411.1 Salmonella_enterica_subsp. 167-1027 | 99.7            | 99.0                |
| CF_iG1_01 | 876              | GQ343069    | extended-spectrum beta-lactamase CTX-M-15 | AY604722.1 Escherichia_coli 634-1509           | 100.0           | 100.0               | AY604722.1 Escherichia_coli 634-1509           | 100.0           | 100.0               |
| CF_iG2_01 | 1224             | GQ343071    | beta-lactamase                            | X76636.1 Citrobacter_freundii 129-1274         | 84.8            | 90.0                | X76636.1 Citrobacter_freundii 129-1274         | 84.8            | 90.0                |
| CF_iG2_02 | 891              | GQ343070    | class A beta lactamase                    | L08472.1 Bacteroides_uniformis 848-1738        | 99.9            | 100.0               | AF148067.1 Escherichia_coli 214-1158           | 53.4            | 40.7                |
| CF_iG2_04 | 1029             | GQ343072    | CMY AmpC beta-lactamase                   | AF349569.1 Citrobacter_freundii 1-1146         | 99.1            | 99.7                | AF349569.1 Citrobacter_freundii 1-1146         | 99.1            | 99.7                |
| CF_iG2_06 | 1146             | GQ343073    | CMY AmpC beta-lactamase                   | AJ487978.2 Citrobacter_youngae 2-1145          | 94.3            | 97.4                | AY960293.2 Escherichia_coli 1-1143             | 86.7            | 93.2                |
| CF_iG2_08 | 1146             | GQ343074    | CMY AmpC beta-lactamase                   | D13207.1 Citrobacter_freundii 143-1288         | 99.4            | 99.5                | D13207.1 Citrobacter_freundii 143-1288         | 99.4            | 99.5                |
| CF_iG2_10 | 1266             | GQ343075    | CMY AmpC beta-lactamase                   | D13207.1 Citrobacter_freundii 143-1288         | 99.4            | 99.5                | D13207.1 Citrobacter_freundii 143-1288         | 99.4            | 99.5                |
| CF_iG2_12 | 1146             | GQ343076    | CMY AmpC beta-lactamase                   | D13207.1 Citrobacter_freundii 143-1288         | 99.4            | 99.5                | D13207.1 Citrobacter_freundii 143-1288         | 99.4            | 99.5                |
| CF_iG2_15 | 1146             | GQ343077    | CMY AmpC beta-lactamase                   | D13207.1 Citrobacter_freundii 143-1288         | 99.4            | 99.5                | D13207.1 Citrobacter_freundii 143-1288         | 99.4            | 99.5                |

| Gene ID   | Gene length [bp] | Gen-bank ID | Gene Annotation                                         | Top hit [gbID title position]                           | Global DNA % ID | Global Protein % ID | Top pathogenic hit [gbID title position]                | Global DNA % ID | Global Protein % ID |
|-----------|------------------|-------------|---------------------------------------------------------|---------------------------------------------------------|-----------------|---------------------|---------------------------------------------------------|-----------------|---------------------|
| CY_iG1_01 | 921              | GQ343119    | D-alanine--D-alanine ligase B                           | K02668.1 Escherichia_coli 146-1066                      | 99.9            | 99.7                | CP000034.1 Shigella_dysenteriae 122887-123807           | 98.9            | 99.0                |
| CY_iG1_04 | 1218             | GQ343120    | aminotransferase                                        | AE005674.1 Shigella_flexneri_2a_str_301 2415674-2416891 | 99.3            | 99.8                | AE005674.1 Shigella_flexneri_2a_str_301 2415674-2416891 | 99.3            | 99.8                |
| CY_iG1_07 | 921              | GQ343121    | cysteine and O-acetyl-L-serine efflux system            | CP000247.1 Escherichia_coli 1567495-1568394             | 98.3            | 98.7                | CP000247.1 Escherichia_coli 1567495-1568394             | 98.3            | 98.7                |
| CY_iG1_09 | 921              | GQ343122    | D-alanine--D-alanine ligase B                           | K02668.1 Escherichia_coli 146-1066                      | 99.9            | 99.7                | CP000034.1 Shigella_dysenteriae 122887-123807           | 98.9            | 99.0                |
| CY_iG1_12 | 1095             | GQ343123    | D-alanyl-alanine synthetase A                           | CP000247.1 Escherichia_coli 467300-468394               | 99.8            | 99.7                | CP000247.1 Escherichia_coli 467300-468394               | 99.8            | 99.7                |
| GE_iG1_01 | 861              | GQ343134    | Aminoglycoside N(3')-acetyltransferase III (ACC(3)-III) | AY458016.1 Escherichia_coli 14339-15199                 | 100.0           | 100.0               | AY458016.1 Escherichia_coli 14339-15199                 | 100.0           | 100.0               |
| GE_iG1_04 | 861              | GQ343135    | Aminoglycoside N(3')-acetyltransferase III (ACC(3)-III) | AY458016.1 Escherichia_coli 14339-15199                 | 100.0           | 100.0               | AY458016.1 Escherichia_coli 14339-15199                 | 100.0           | 100.0               |
| GE_iG1_06 | 867              | GQ343136    | Aminoglycoside N(3')-acetyltransferase III (ACC(3)-III) | AY458016.1 Escherichia_coli 14339-15199                 | 100.0           | 100.0               | AY458016.1 Escherichia_coli 14339-15199                 | 100.0           | 100.0               |
| MN_iG2_01 | 1275             | GQ343143    | tetracycline resistance protein tetA                    | AY458016.1 Escherichia_coli 5854-7053                   | 100.0           | 100.0               | AY458016.1 Escherichia_coli 5854-7053                   | 100.0           | 100.0               |
| MN_iG2_03 | 1065             | GQ343144    | tetracycline resistance protein tetA                    | AY509004.1 Salmonella_enterica_subsp. 2514-3713         | 100.0           | 100.0               | AY509004.1 Salmonella_enterica_subsp. 2514-3713         | 100.0           | 100.0               |
| OX_iG2_01 | 1275             | GQ343149    | TetA                                                    | AY333434.1 Salmonella_typhimurium 71832-73031           | 100.0           | 100.0               | AY333434.1 Salmonella_typhimurium 71832-73031           | 100.0           | 100.0               |

| Gene ID   | Gene length [bp] | Gen-bank ID | Gene Annotation                      | Top hit [gbID title position]                                  | Global DNA % ID | Global Protein % ID | Top pathogenic hit [gbID title position]                       | Global DNA % ID | Global Protein % ID |
|-----------|------------------|-------------|--------------------------------------|----------------------------------------------------------------|-----------------|---------------------|----------------------------------------------------------------|-----------------|---------------------|
| OX_iG2_02 | 1128             | GQ343150    | TetA                                 | AY333434.1 Salmonella_typhimurium 71832-73031                  | 100.0           | 100.0               | AY333434.1 Salmonella_typhimurium 71832-73031                  | 100.0           | 100.0               |
| OX_iG2_03 | 1275             | GQ343152    | TetA                                 | AY333434.1 Salmonella_typhimurium 71832-73031                  | 100.0           | 100.0               | AY333434.1 Salmonella_typhimurium 71832-73031                  | 100.0           | 100.0               |
| OX_iG2_04 | 1128             | GQ343148    | tetracycline resistance protein tetA | AY458016.1 Escherichia_coli 5854-7053                          | 100.0           | 100.0               | AY458016.1 Escherichia_coli 5854-7053                          | 100.0           | 100.0               |
| OX_iG2_06 | 1275             | GQ343151    | tetracycline resistance protein tetA | AY458016.1 Escherichia_coli 5854-7053                          | 100.0           | 100.0               | AY458016.1 Escherichia_coli 5854-7053                          | 100.0           | 100.0               |
| PE_iG1_01 | 861              | GQ343159    | beta-lactamase                       | AY123253.3 Klebsiella_pneumoniae 24558-25418                   | 100.0           | 100.0               | AY123253.3 Klebsiella_pneumoniae 24558-25418                   | 100.0           | 100.0               |
| PE_iG1_02 | 1263             | GQ343155    | AmpC beta-lactamase                  | DQ092425.1 Escherichia_coli 185-1318                           | 100.0           | 100.0               | DQ092425.1 Escherichia_coli 185-1318                           | 100.0           | 100.0               |
| PE_iG1_04 | 567              | GQ343156    | AmpC beta-lactamase                  | DQ092426.1 Escherichia_coli 185-1318                           | 99.6            | 99.5                | DQ092426.1 Escherichia_coli 185-1318                           | 99.6            | 99.5                |
| PE_iG1_07 | 1167             | GQ343157    | AmpC beta-lactamase                  | BA000007.2 Escherichia_coli_O157:H7_str._Sakai 5232091-5233224 | 98.9            | 99.2                | BA000007.2 Escherichia_coli_O157:H7_str._Sakai 5232091-5233224 | 98.9            | 99.2                |
| PE_iG1_09 | 876              | GQ343158    | CTX-M beta-lactamase                 | AY604722.1 Escherichia_coli 634-1509                           | 100.0           | 100.0               | AY604722.1 Escherichia_coli 634-1509                           | 100.0           | 100.0               |
| PE_iG2_01 | 861              | GQ343160    | beta-lactamase                       | AY883411.1 Salmonella_enterica_subsp. 167-1027                 | 99.7            | 99.0                | AY883411.1 Salmonella_enterica_subsp. 167-1027                 | 99.7            | 99.0                |
| PE_iG2_02 | 861              | GQ343164    | beta-lactamase                       | AY883411.1 Salmonella_enterica_subsp. 167-1027                 | 99.7            | 99.0                | AY883411.1 Salmonella_enterica_subsp. 167-1027                 | 99.7            | 99.0                |
| PE_iG2_03 | 1146             | GQ343161    | CMY AmpC beta-lactamase              | AF349569.1 Citrobacter_freundii 1-1146                         | 99.2            | 99.7                | AF349569.1 Citrobacter_freundii 1-1146                         | 99.2            | 99.7                |
| PE_iG2_05 | 1263             | GQ343162    | AmpC beta-lactamase                  | DQ092423.1 Escherichia_coli 185-1318                           | 100.0           | 100.0               | DQ092423.1 Escherichia_coli 185-1318                           | 100.0           | 100.0               |

| Gene ID   | Gene length [bp] | Gen-bank ID | Gene Annotation                                         | Top hit [gbID title position]                                     | Global DNA % ID | Global Protein % ID | Top pathogenic hit [gbID title position]            | Global DNA % ID | Global Protein % ID |
|-----------|------------------|-------------|---------------------------------------------------------|-------------------------------------------------------------------|-----------------|---------------------|-----------------------------------------------------|-----------------|---------------------|
| PE_iG2_07 | 1167             | GQ343163    | AmpC beta-lactamase                                     | U00096.2 Escherichia_coli_str._K12_substr._MG1655 4375834-4376967 | 100.0           | 100.0               | AE014075.1 Escherichia_coli 4986532-4987698         | 98.2            | 98.5                |
| PE_iG2_09 | 1263             | GQ343165    | AmpC beta-lactamase                                     | U00096.2 Escherichia_coli_str._K12_substr._MG1655 4375834-4376967 | 100.0           | 100.0               | AE014075.1 Escherichia_coli 4986532-4987698         | 98.2            | 98.5                |
| PE_iG2_12 | 387              | GQ343166    | TEM beta-lactamase                                      | AF427131.1 Escherichia_coli 209-1069                              | 100.0           | 100.0               | AF427131.1 Escherichia_coli 209-1069                | 100.0           | 100.0               |
| PE_iG2_13 | 861              | GQ343167    | TEM beta-lactamase                                      | AL513383.1 Salmonella_enterica_subsp. 161911-162771               | 99.8            | 99.7                | AL513383.1 Salmonella_enterica_subsp. 161911-162771 | 99.8            | 99.7                |
| PI_iG2_01 | 861              | GQ343171    | beta-lactamase                                          | AY883411.1 Salmonella_enterica_subsp. 167-1027                    | 99.7            | 99.0                | AY883411.1 Salmonella_enterica_subsp. 167-1027      | 99.7            | 99.0                |
| PI_iG2_03 | 1146             | GQ343172    | beta-lactamase                                          | AF349569.1 Citrobacter_freundii 1-1146                            | 99.2            | 99.7                | AF349569.1 Citrobacter_freundii 1-1146              | 99.2            | 99.7                |
| PI_iG2_04 | 861              | GQ343175    | TEM beta-lactamase                                      | AY883411.1 Salmonella_enterica_subsp. 167-1027                    | 99.7            | 99.0                | AY883411.1 Salmonella_enterica_subsp. 167-1027      | 99.7            | 99.0                |
| PI_iG2_05 | 666              | GQ343173    | TEM beta-lactamase                                      | AL513383.1 Salmonella_enterica_subsp. 161911-162771               | 99.7            | 99.1                | AL513383.1 Salmonella_enterica_subsp. 161911-162771 | 99.7            | 99.1                |
| PI_iG2_08 | 861              | GQ343174    | TEM beta-lactamase                                      | AY883411.1 Salmonella_enterica_subsp. 167-1027                    | 99.7            | 99.0                | AY883411.1 Salmonella_enterica_subsp. 167-1027      | 99.7            | 99.0                |
| PI_iG2_09 | 861              | GQ343176    | TEM beta-lactamase                                      | AY883411.1 Salmonella_enterica_subsp. 167-1027                    | 99.7            | 99.0                | AY883411.1 Salmonella_enterica_subsp. 167-1027      | 99.7            | 99.0                |
| PI_iG2_10 | 405              | GQ343177    | TEM beta-lactamase                                      | X68082.1 artificial_sequences_synthetic 1-1071                    | 99.5            | 100.0               | AY123253.3 Klebsiella_pneumoniae 24558-25418        | 100.0           | 100.0               |
| SI_iG1_01 | 861              | GQ343184    | Aminoglycoside N(3')-acetyltransferase III (ACC(3)-III) | AY458016.1 Escherichia_coli 14339-15199                           | 100.0           | 100.0               | AY458016.1 Escherichia_coli 14339-15199             | 100.0           | 100.0               |

| <b>Gene ID</b> | <b>Gene length [bp]</b> | <b>Gen-bank ID</b> | <b>Gene Annotation</b>                         | <b>Top hit [gbID title position]</b>     | <b>Global DNA % ID</b> | <b>Global Protein % ID</b> | <b>Top pathogenic hit [gbID title position]</b> | <b>Global DNA % ID</b> | <b>Global Protein % ID</b> |
|----------------|-------------------------|--------------------|------------------------------------------------|------------------------------------------|------------------------|----------------------------|-------------------------------------------------|------------------------|----------------------------|
| SI_iG1_02      | 600                     | GQ343185           | aminoglycoside 6'-N-acetyl transferase type Ib | AY458016.1 Escherichia _coli 11679-12278 | 100.0                  | 100.0                      | AY458016.1 Escherichia _coli 11679-12278        | 100.0                  | 100.0                      |
| TE_iG2_01      | 1275                    | GQ343187           | tetracycline resistance protein tetA           | AY458016.1 Escherichia _coli 5854-7053   | 100.0                  | 100.0                      | AY458016.1 Escherichia _coli 5854-7053          | 100.0                  | 100.0                      |

Table S5: Statistics for library screening and sequencing.

| <b>Antibiotic class</b> | <b>Number of clones cultured aerobes</b> | <b>Number of clones metagenomic</b> | <b>Clones sequenced cultured aerobes</b> | <b>Clones sequenced metagenomic</b> | <b>Unique genes cultured aerobes</b> | <b>Unique genes metagenomic</b> |
|-------------------------|------------------------------------------|-------------------------------------|------------------------------------------|-------------------------------------|--------------------------------------|---------------------------------|
| Aminoglycoside          | 128                                      | 356                                 | 44                                       | 21                                  | 23                                   | 7                               |
| Amino acid derivative   | 712                                      | 2408                                | 8                                        | 79                                  | 5                                    | 49                              |
| Amphenicols             | 0                                        | 12                                  | 0                                        | 12                                  | 0                                    | 2                               |
| Beta-lactam             | 2170                                     | 1330                                | 240                                      | 140                                 | 78                                   | 29                              |
| Tetracyclines           | 272                                      | 191                                 | 52                                       | 38                                  | 9                                    | 8                               |
| <b>Total</b>            | <b>3282</b>                              | <b>4297</b>                         | <b>344</b>                               | <b>290</b>                          | <b>115</b>                           | <b>95</b>                       |

Table S6: Transposon sequences identified using functional selections from human microbiomes. Gene ID is made up of the 2 letter code for the antibiotics used for the selections (e.g. AX denotes Amoxicillin, see Table S1), an m denoting metagenomic origin of DNA insert or an i denoting cultured aerobic isolate origin of DNA insert, microbiome two letter code (e.g. O1 denotes oral microbiome 1, G2 denotes gut microbiome 2) and) and a numeric identifier. Also listed is gene ID of the resistance gene adjacent to the transposon element (Table S3 and S4). For each gene identified, the most similar gene from the GenBank was identified using tblastx. Global sequence identities at the nucleotide level between these genes were computed using clustalW (3).

| Gene ID   | Resistance Gene ID | Genbank ID | Annotation                                 | Top tblastx hit [gbID title position]        | Global DNA % ID |
|-----------|--------------------|------------|--------------------------------------------|----------------------------------------------|-----------------|
| AM_iG1_08 | AM_iG1_07          | GQ342978   | transposase                                | AY123253.3 Klebsiella_pneumoniae 18627-19331 | 100.0           |
| AM_iG1_18 | AM_iG1_19          | GQ342986   | transposase                                | AY123253.3 Klebsiella_pneumoniae 20489-21193 | 100.0           |
| AX_iG1_02 | AX_iG1_01          | GQ343004   | transposon Tn3 resolvase                   | AY123253.3 Klebsiella_pneumoniae 25601-26158 | 100.0           |
| AX_iG1_05 | AX_iG1_04          | GQ343005   | transposase, partial sequence              | AY123253.3 Klebsiella_pneumoniae 26322-29327 | 100.0           |
| AX_iG1_07 | AX_iG1_06          | GQ343006   | transposon Tn3 resolvase                   | AY123253.3 Klebsiella_pneumoniae 25601-26158 | 100.0           |
| AX_iG1_09 | AX_iG1_08          | GQ343007   | transposase                                | AY604721.1 Escherichia_coli 1031-2293        | 100.0           |
| AX_iG2_11 | AX_iG2_10          | GQ343011   | transposon Tn3 resolvase, partial sequence | AY123253.3 Klebsiella_pneumoniae 25601-26158 | 99.7            |
| AX_iG2_13 | AX_iG2_12          | GQ343012   | transposase, partial sequence              | AY458016.1 Escherichia_coli 8125-9639        | 99.7            |
| AX_iG2_16 | AX_iG2_15          | GQ343014   | transposase, partial sequence              | CR376602.1 Aeromonas_punctata 82018-83769    | 99.9            |

| Gene ID   | Resistance Gene ID | Genbank ID | Annotation                                 | Top tblastx hit [gbID title position]        | Global DNA % ID |
|-----------|--------------------|------------|--------------------------------------------|----------------------------------------------|-----------------|
| AX_iG2_20 | AX_iG2_19          | GQ343017   | transposase, partial sequence              | AY458016.1 Escherichia_coli 8125-9639        | 99.7            |
| AX_iG2_25 | AX_iG2_24          | GQ343020   | transposase, partial sequence              | AY458016.1 Escherichia_coli 8125-9639        | 99.7            |
| AX_iG2_34 | AX_iG2_33          | GQ343024   | transposase, partial sequence              | AJ517790.2 Aeromonas_salmonicida 9887-11642  | 99.6            |
| AX_iG2_49 | AX_iG2_48          | GQ343032   | transposon Tn3 resolvase                   | AY123253.3 Klebsiella_pneumoniae 25601-26158 | 99.6            |
| AX_iG2_50 | AX_iG2_48          | GQ343032   | transposase, partial sequence              | AY458016.1 Escherichia_coli 8125-9639        | 99.7            |
| AX_mG2_02 | AX_mG2_01          | GQ342996   | transposase                                | M60018.1 Bacteroides_fragilis 138-1430       | 97.8            |
| AX_mG2_06 | AX_mG2_05          | GQ343000   | C-terminal end of transposase, IS30 family | M17124.1 Bacteroides_fragilis 8-988          | 100.0           |
| CA_iG1_08 | CA_iG1_07          | GQ343050   | transposon Tn3 resolvase                   | AY123253.3 Klebsiella_pneumoniae 25601-26158 | 100.0           |
| CA_iG1_10 | CA_iG1_09          | GQ343051   | transposase, partial sequence              | AY123253.3 Klebsiella_pneumoniae 26322-29327 | 99.3            |
| CA_iG2_03 | CA_iG2_02          | GQ343063   | transposase protein                        | AY458016.1 Escherichia_coli 8125-9639        | 96.2            |
| CA_iG2_05 | CA_iG2_04          | GQ343064   | transposase protein                        | AY458016.1 Escherichia_coli 8125-9639        | 99.3            |
| CA_iG2_18 | CA_iG2_17          | GQ343062   | transposon Tn3 resolvase, partial sequence | AY214164.3 Escherichia_coli 99628-100185     | 100.0           |
| CA_mG2_09 | CA_mG2_10          | GQ343036   | transposase,                               | M60018.1 Bacteroides_fragilis 138-1430       | 97.8            |



| Gene ID   | Resistance Gene ID | Genbank ID | Annotation                       | Top tblastx hit [gbID title position]             | Global DNA % ID |
|-----------|--------------------|------------|----------------------------------|---------------------------------------------------|-----------------|
| GE_iG1_02 | GE_iG1_01          | GQ343134   | transposase                      | AY123253.3 Klebsiella_pneumoniae 20489-21193      | 100.0           |
| GE_iG1_08 | GE_iG1_06          | GQ343136   | transposase                      | AY123253.3 Klebsiella_pneumoniae 20489-21193      | 100.0           |
| PE_iG1_10 | PE_iG1_09          | GQ343158   | transposase,<br>partial sequence | AY604721.1 Escherichia_coli 1031-2293             | 100.0           |
| PE_iG1_11 | PE_iG1_09          | GQ343158   | transposase,<br>partial sequence | AY509004.1 Salmonella_enterica_subsp. 67937-73114 | 100.0           |
| PE_iG2_14 | PE_iG2_13          | GQ343167   | transposon Tn3<br>resolvase      | AY214164.3 Escherichia_coli 99628-100185          | 100.0           |
| PI_iG2_02 | PI_iG2_01          | GQ343171   | transposase                      | AY458016.1 Escherichia_coli 8125-9639             | 99.0            |
| PI_iG2_06 | PI_iG2_05          | GQ343173   | transposase                      | AY458016.1 Escherichia_coli 8125-9639             | 99.7            |

Table S7: Shared and unique resistance genes isolated from two unrelated individuals. The number of genes derived from metagenomic libraries or from cultured aerobic isolates are categorized as unique to an individual, or shared between individuals. For each category, the subset of genes also similar (>90 % nucleotide identity) to any gene in GenBank are shown in parentheses.

|                           | Only Individual 1 <sup>†</sup> | Only Individual 2 <sup>†</sup> | Shared between 1 & 2 <sup>‡</sup> |
|---------------------------|--------------------------------|--------------------------------|-----------------------------------|
| Metagenomic               | 35 (5)                         | 52 (4)                         | 8 (8)                             |
| Cultured aerobic isolates | 24 (22)                        | 13 (10)                        | 78 (78)                           |

<sup>†</sup> Genes are defined as unique to an individual if the nucleotide sequence identity to all genes in the other individual is less than 90 %.

<sup>‡</sup> Genes are defined as shared between two individuals if the nucleotide sequence identity from a gene in one individual is greater than 90 % to a gene in the other individual.

**Supporting references.**

1. J. R. Cole *et al.*, *Nucleic Acids Res* **35**, D169 (2007).
2. R. Lutz, H. Bujard, *Nucleic Acids Res* **25**, 1203 (1997).
3. R. Chenna *et al.*, *Nucleic Acids Res* **31**, 3497 (2003).
4. G. A. Jacoby, *Antimicrob Agents Chemother* **50**, 1123 (2006).
5. G. A. Jacoby, *Clin Microbiol Rev* **22**, 161 (2009).
6. M. Barlow, B. G. Hall, *Antimicrob Agents Chemother* **46**, 1190 (2002).
7. G. A. Jacoby, K. Bush, Amino Acid Sequences for TEM, SHV and OXA Extended-Spectrum and Inhibitor Resistant  $\beta$ -Lactamases, <http://lahey.org/studies/>
8. M. A. Larkin *et al.*, *Bioinformatics* **23**, 2947 (2007).
9. N. Saitou, M. Nei, *Mol Biol Evol* **4**, 406 (1987).
10. V. I. Enne, C. Cassar, K. Sprigings, M. J. Woodward, P. M. Bennett, *FEMS Microbiol Lett* **278**, 193 (2008).
11. Z. Leng, D. E. Riley, R. E. Berger, J. N. Krieger, M. C. Roberts, *J Antimicrob Chemother* **40**, 551 (1997).
12. S. Demaneche *et al.*, *Proc Natl Acad Sci U S A* **105**, 3957 (2008).
13. C. S. Riesenfeld, R. M. Goodman, J. Handelsman, *Environmental Microbiology* **6**, 981 (2004).
